# Supplementary material for: Fe3O4@ABA-aniline-CuI nanocomposite as a highly efficient and reusable nanocatalyst for the synthesis of benzothiazole-sulfide aryls and heteroaryls
Source: Royal Society of Chemistry journal article supplement (doi:10.1039/d3ra03069e), 2023-01-01
Supplement: d3ra03069e1.pdf [file d3ra03069e1.pdf]

## **Fe<sub>3</sub>O<sub>4</sub>@ABA-Aniline-CuI nanocomposite as a highly efficient and reusable nanocatalyst for synthesis of benzothiazole-sulfide aryls and heteroaryl**

Mingzhe Sun <sup>1</sup>\*, Wei Liu <sup>2</sup>, Wei Wu <sup>1</sup>, Qun Li <sup>1</sup>, Li Shen <sup>3</sup>\*

<sup>1</sup> College of Food and Biology, Changchun Polytechnic, Changchun, Jilin 130033, China

<sup>2</sup> Jilin Normal University, Siping, Jilin 136000, China

<sup>3</sup> Institute Chemical and Nanotechnology, Beijing, China.

**Mail:** [lshen1985@gmail.com](mailto:lshen1985@gmail.com) and [mingzhesun2021@163.com](mailto:mingzhesun2021@163.com)

### **Abstract**

Studying diaryl sulfides and benzothiazoles is important in organic synthesis because a large number of natural and medicinal products contain these scaffolds. Over the past few years, the research on the synthesis of compounds containing benzothiazole-sulfide aryls as important biological molecules have received a significant attention. Multicomponent reactions are the most popular strategy for the performance of difficult reactions and the synthesis of complexed-molecules such as benzothiazole-sulfide aryls. In this work, CuI immobilized on the surface of magnetic Fe<sub>3</sub>O<sub>4</sub> nanoparticles modified with aniline and 4-aminobenzoic acid [Fe<sub>3</sub>O<sub>4</sub>@ABA-Aniline-CuI nanocomposite] were successfully constructed and its catalytic activity were investigated in the preparation of a broad range of benzothiazole-sulfide aryls and heteroaryl through the one-pot three-component reactions of 2-iodoaniline with carbon disulfide and aryl or heteroaryl iodides in the presence of KOAc as base in PEG as solvent. TEM and SEM images revealed that the shape of the Fe<sub>3</sub>O<sub>4</sub>@ABA-Aniline-CuI particles is spherical and the size of the particles is approximately between 12-25 nanometers.

**Keywords:** Fe<sub>3</sub>O<sub>4</sub>@ABA-Aniline-CuI nanocatalyst, benzothiazole-sulfide aryls, Magnetically recoverable catalyst, Nanometer range, Multicomponent reactions.

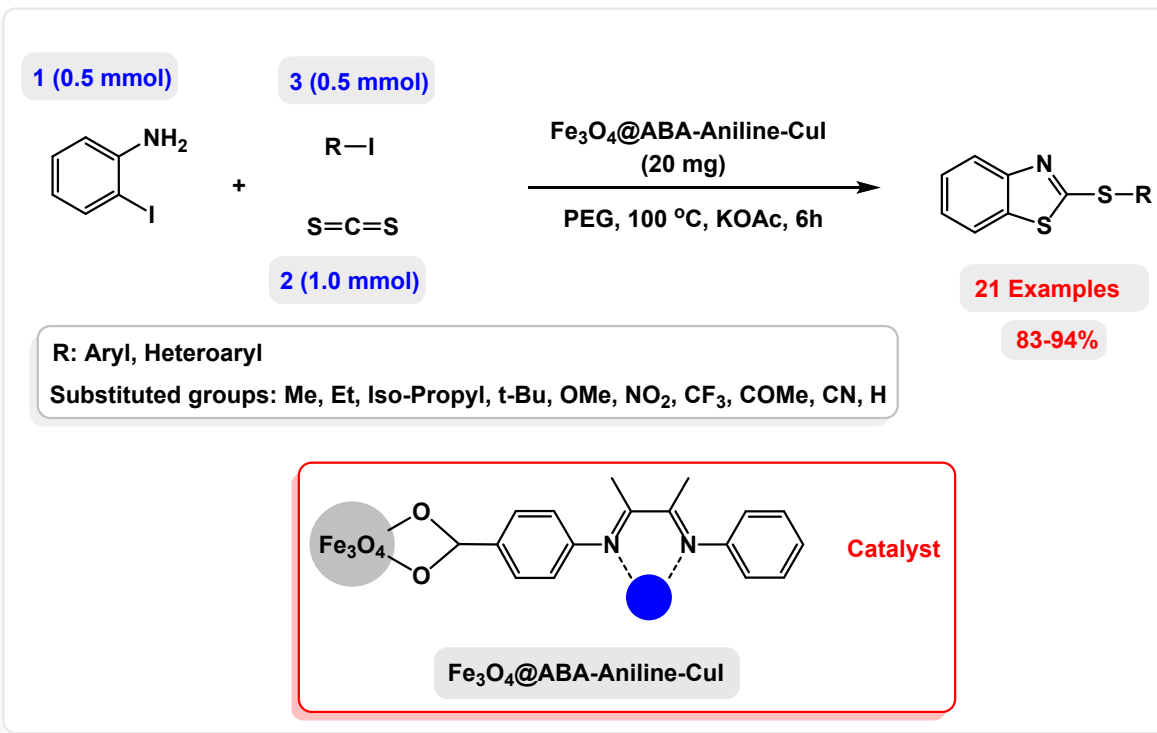

Scope of Fe<sub>3</sub>O<sub>4</sub>@ABA-Aniline-CuI nanocatalyst in synthesis of benzothiazole-sulfide aryls. <sup>a</sup>

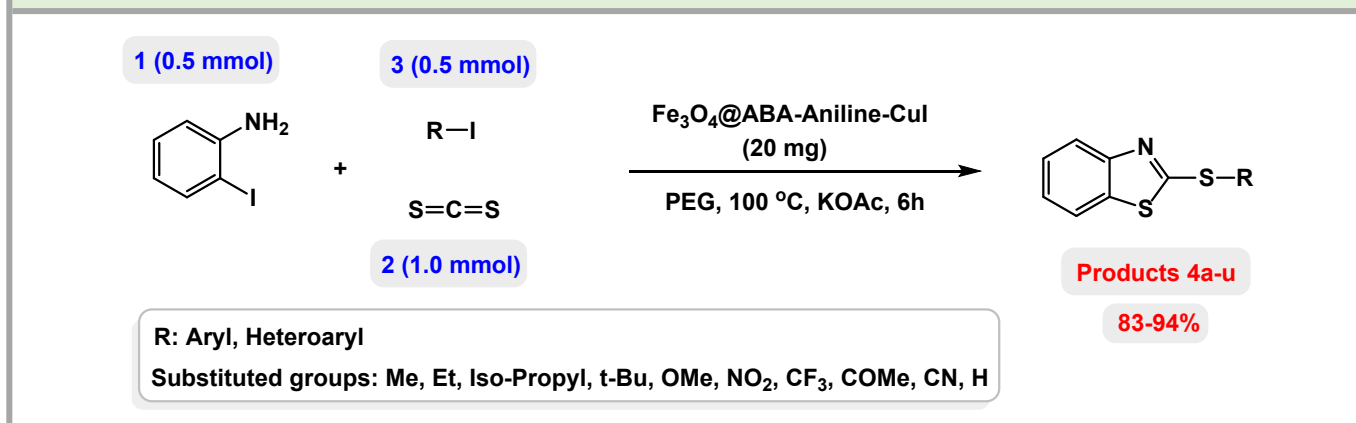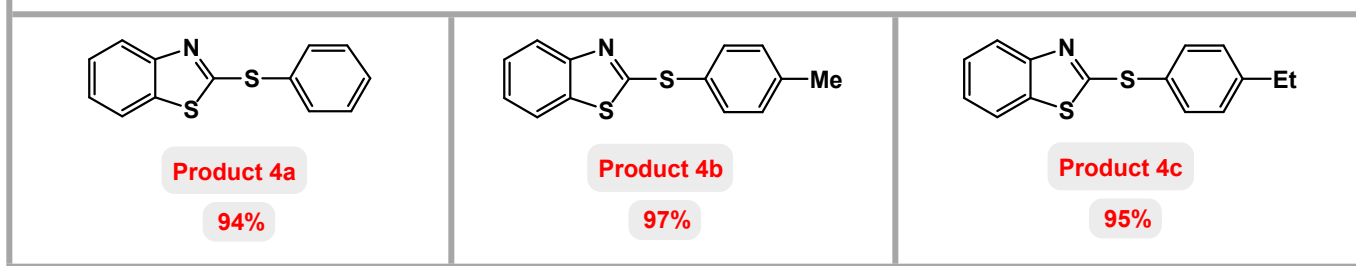

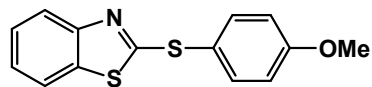

**Product 4d**

97%

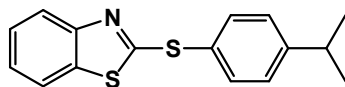

**Product 4e**

88%

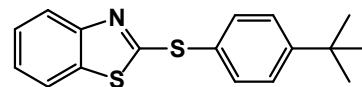

**Product 4f**

83%

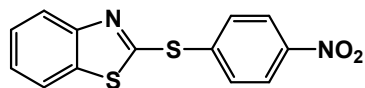

**Product 4g**

90%

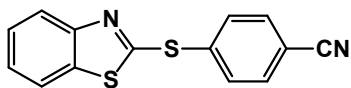

**Product 4h**

91%

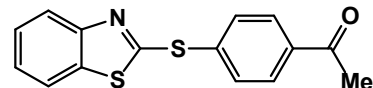

**Product 4i**

90%

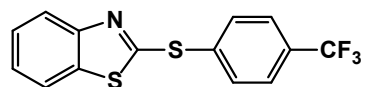

**Product 4j**

86%

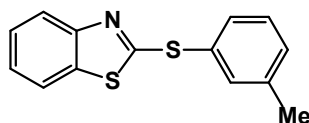

**Product 4k**

95%

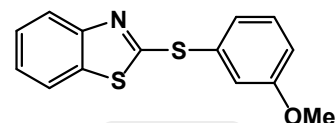

**Product 4l**

93%

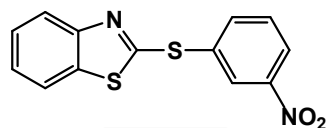

**Product 4m**

86%

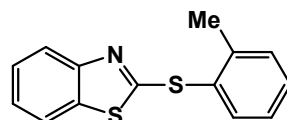

**Product 4n**

96%

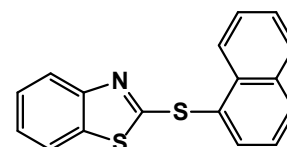

**Product 4o**

91%

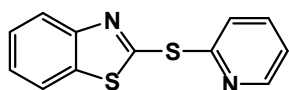

**Product 4p**

93%

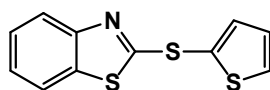

**Product 4q**

91%

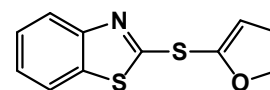

**Product 4r**

89%

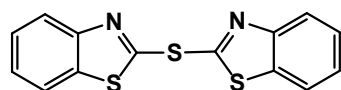

**Product 4s**

90%

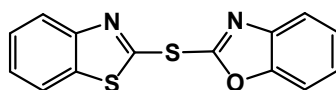

**Product 4t**

87%

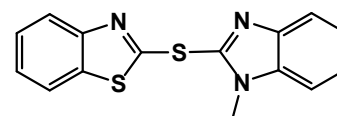

**Product 4u**

91%

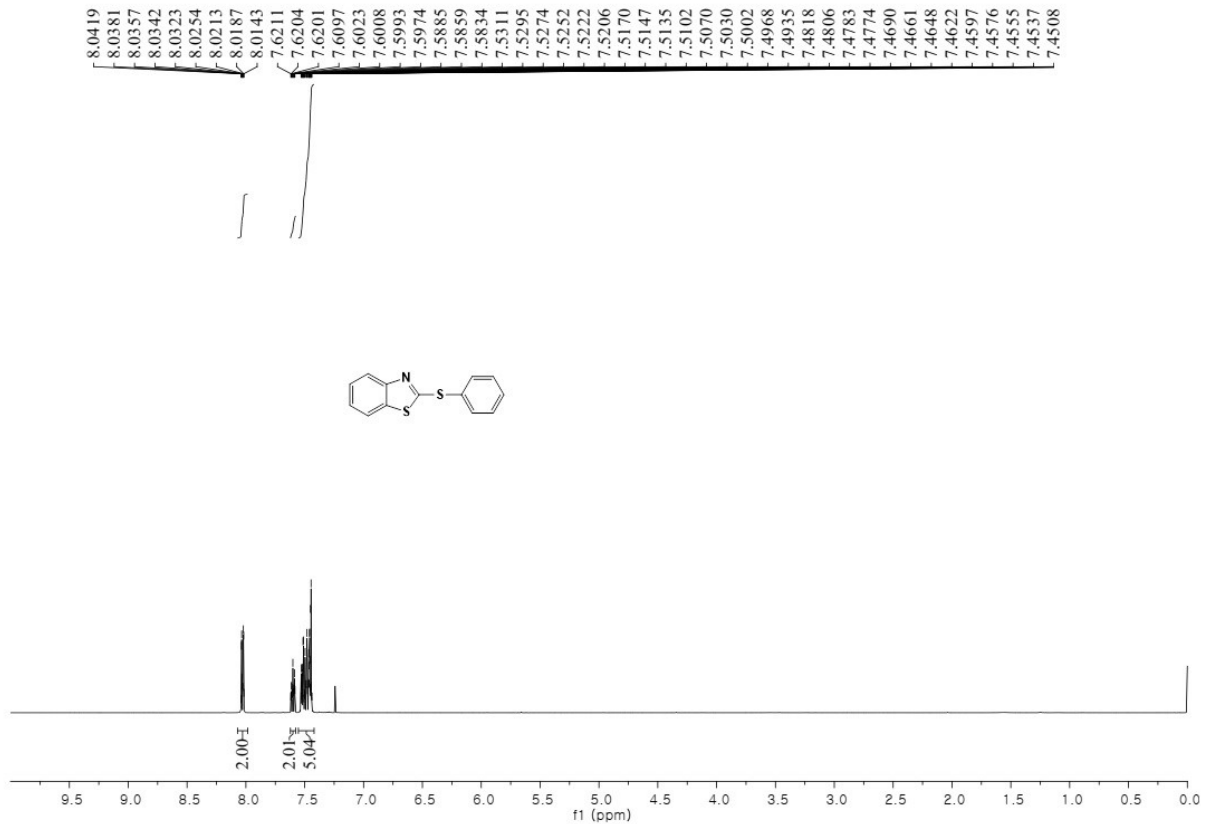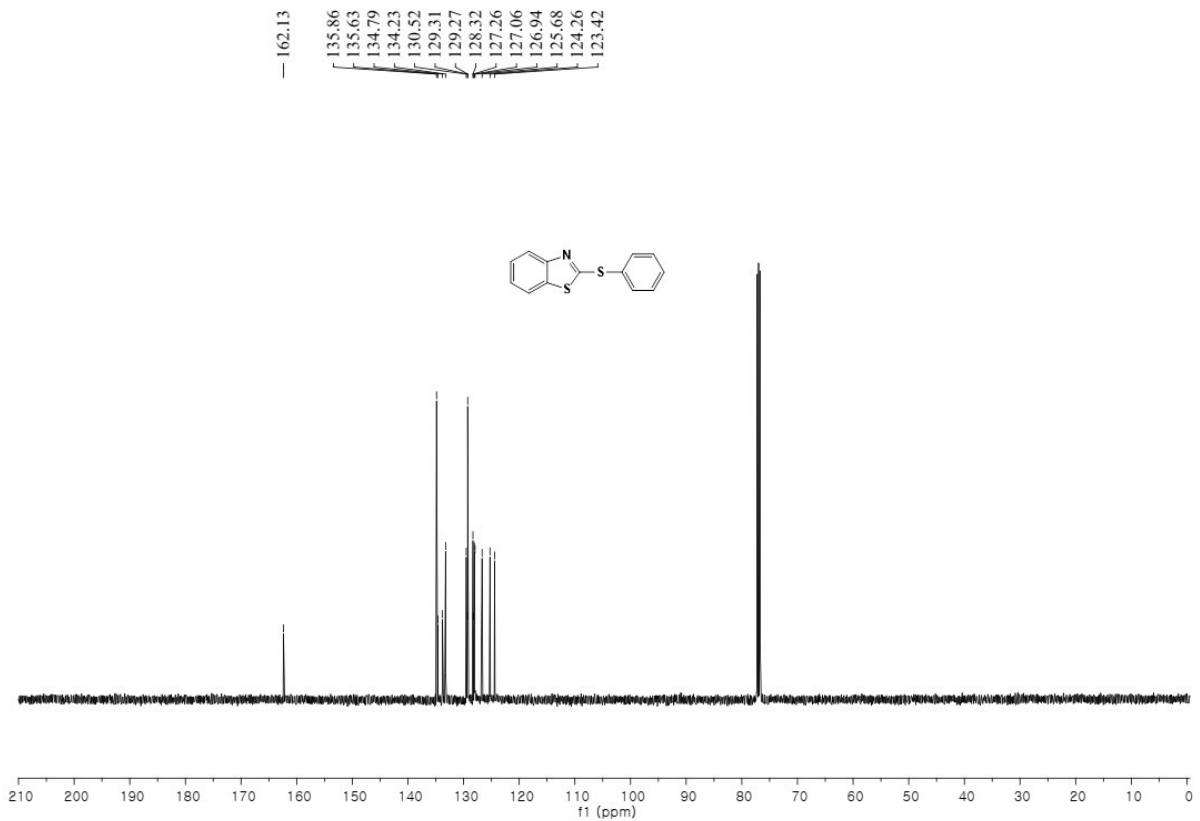

2-(phenylthio)benzo[d]thiazole:  $^1\text{H}$  NMR (500 MHz,  $\text{CDCl}_3$ )  $\delta$  8.04–8.01 (m, 2H), 7.62–7.60 (m, 2H), 7.59–7.45 (m, 5H);  $^{13}\text{C}\{^1\text{H}\}$  NMR (126 MHz,  $\text{CDCl}_3$ )  $\delta$  162.1, 135.9, 135.6, 134.8, 134.2, 130.5, 129.3, 129.2, 128.3, 127.2, 127.0, 126.1, 125.7, 124.3, 123.4

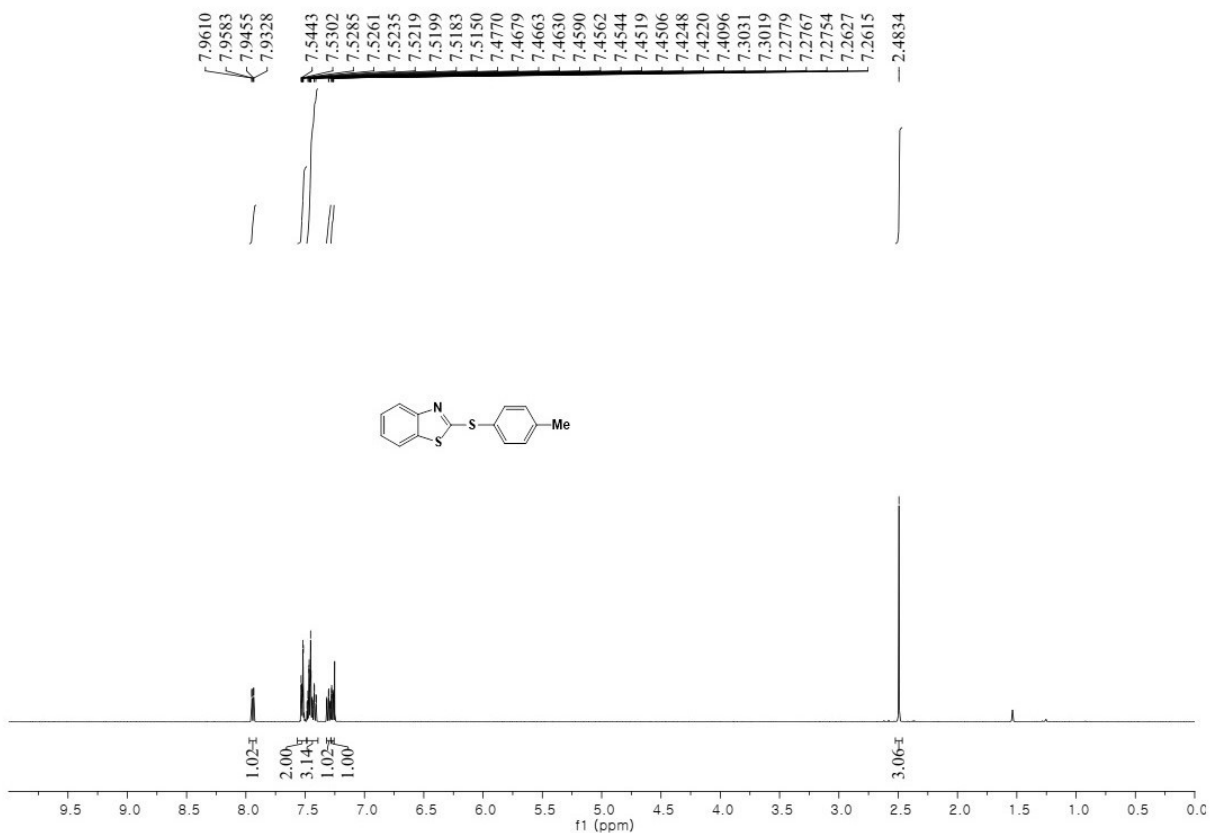

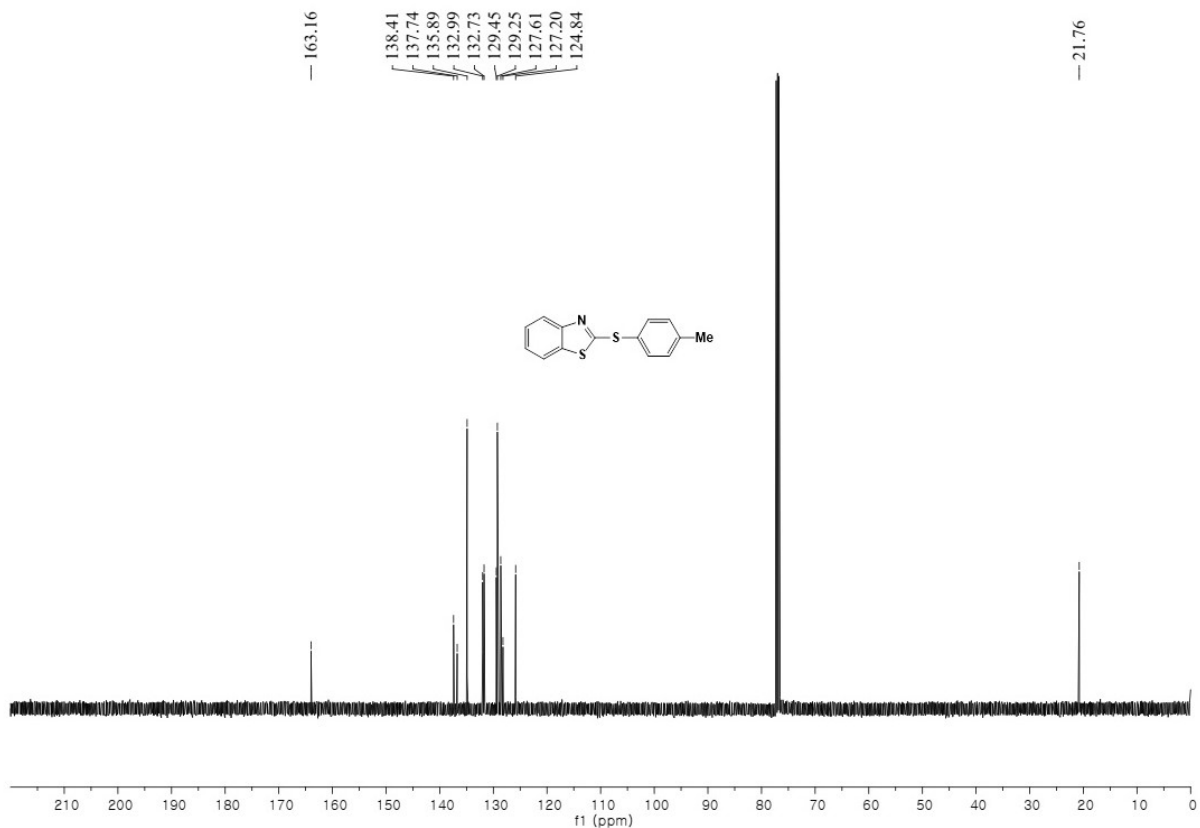

2-(p-tolylthio)benzo[d]thiazole:  $^1\text{H}$  NMR (500 MHz,  $\text{CDCl}_3$ )  $\delta$  7.96 (dd,  $J = 7.8, 1.3$  Hz, 1H), 7.54–7.51 (m, 2H), 7.51–7.47 (m, 3H), 7.46–7.42 (m, 2H), 7.40–7.26 (m, 1H), 2.49 (s, 3H);  $^{13}\text{C}\{^1\text{H}\}$  NMR (126 MHz,  $\text{CDCl}_3$ )  $\delta$  163.2, 138.4, 137.7, 135.9, 132.9, 132.7, 129.5, 129.3, 127.6, 127.2, 124.8, 21.8.

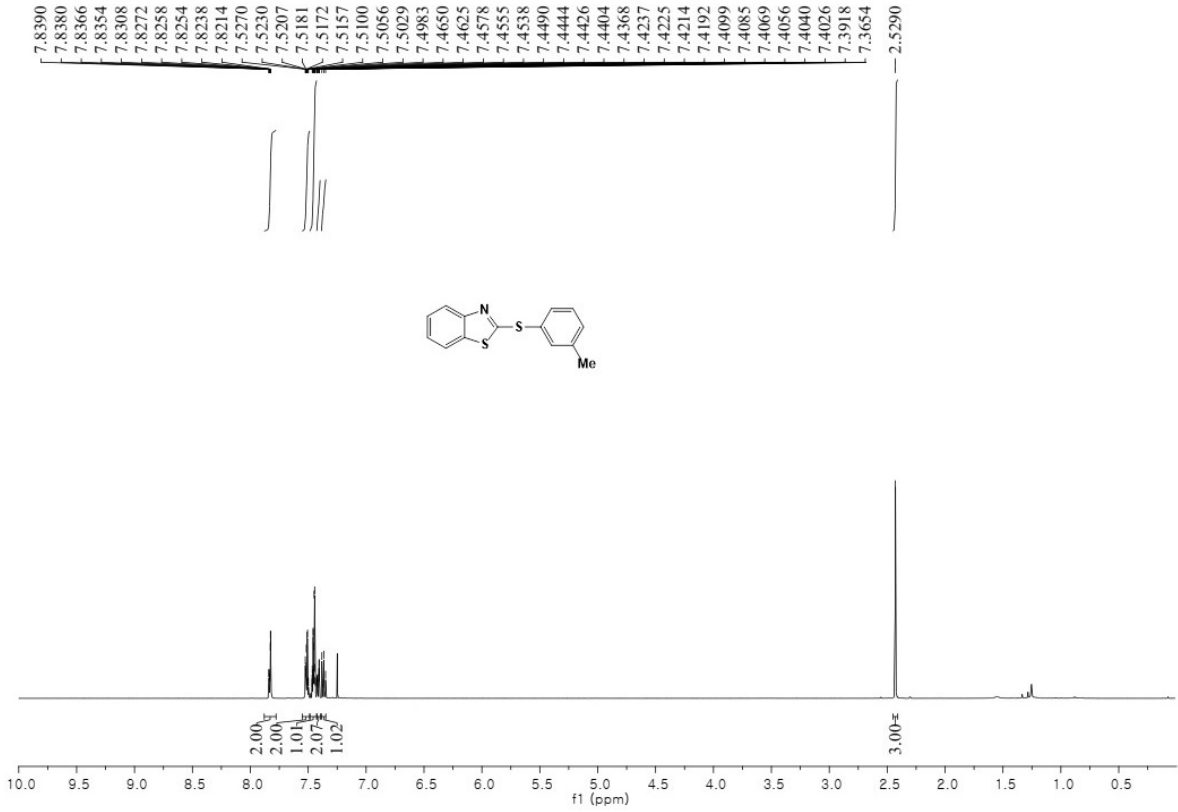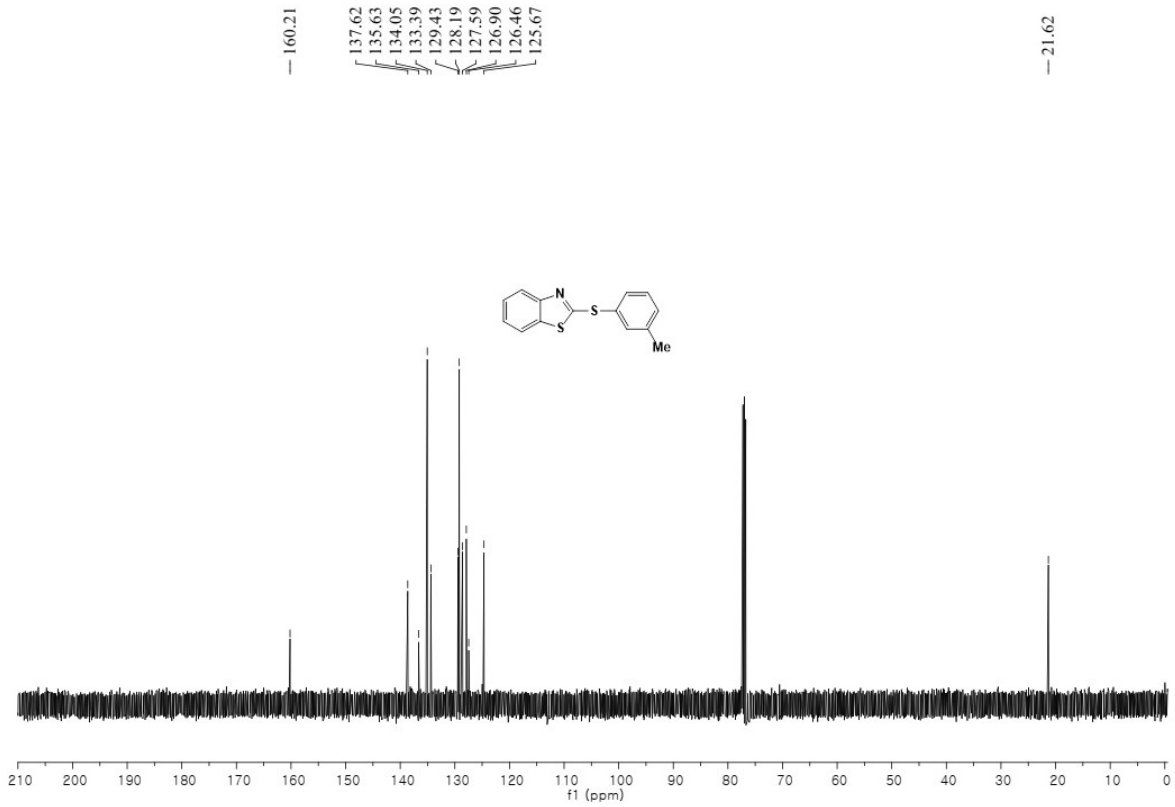

2-(m-tolylthio)benzo[d]thiazole:  $^1\text{H}$  NMR (500 MHz,  $\text{CDCl}_3$ )  $\delta$  7.84–7.82 (m, 2H), 7.52–7.51 (m, 2H), 7.50–7.43 (m, 1H), 7.42–7.41 (m, 2H), 7.39–7.36 (m, 1H), 2.52 (s, 3H);  $^{13}\text{C}\{^1\text{H}\}$  NMR (126 MHz,  $\text{CDCl}_3$ )  $\delta$  160.2, 137.6, 135.6, 134.1, 133.4, 129.4, 128.2, 127.6, 126.9, 126.5, 125.7, 21.6.

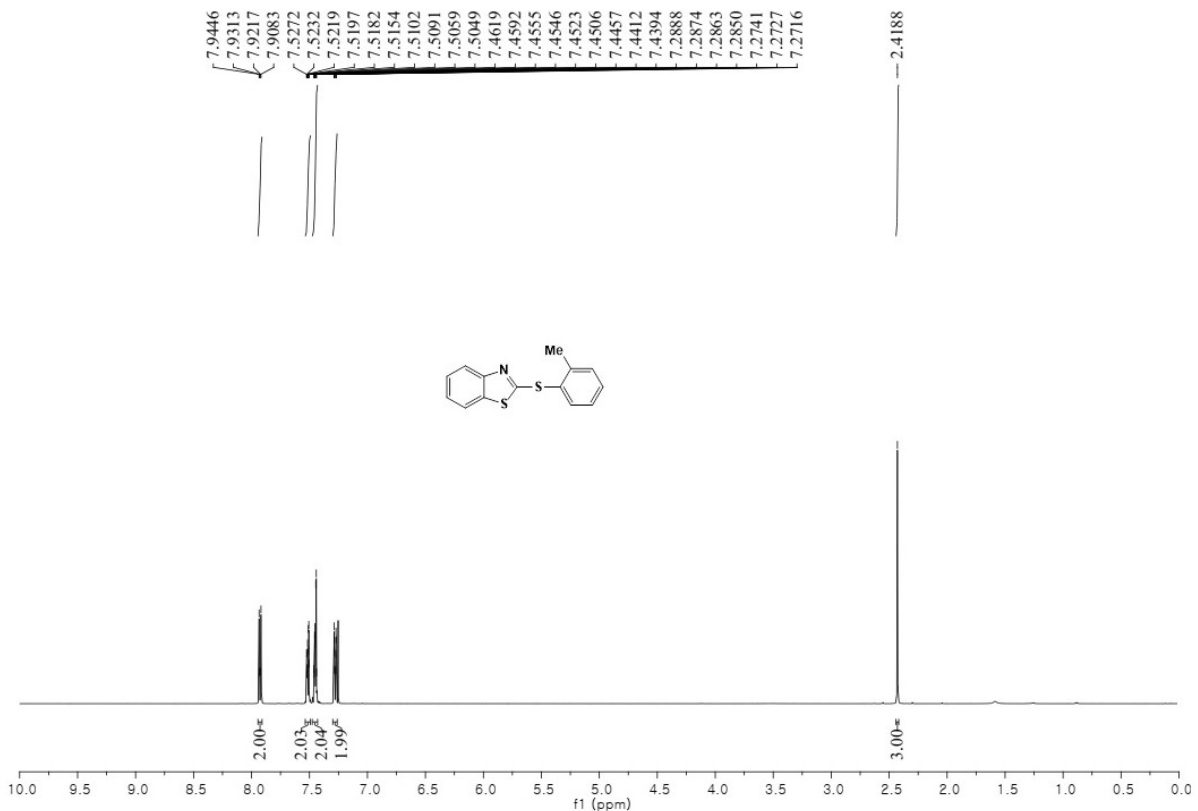



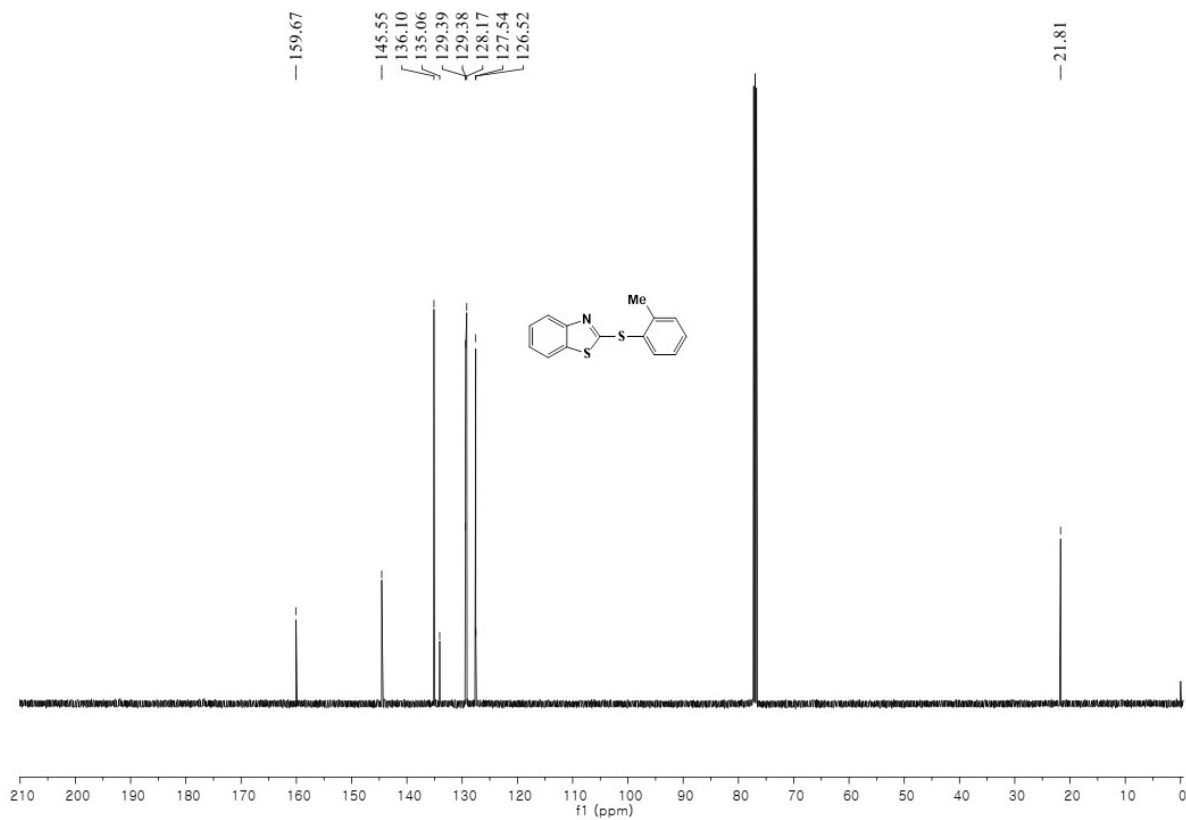

2-(o-tolylthio)benzo[d]thiazole:  $^1\text{H}$  NMR (500 MHz,  $\text{CDCl}_3$ )  $\delta$  7.94 (d,  $J = 8.2$  Hz, 2H), 7.53–7.48 (m, 2H), 7.48–7.42 (m, 2H), 7.31–7.27 (m, 2H), 2.41 (s, 3H);  $^{13}\text{C}\{^1\text{H}\}$  NMR (126 MHz,  $\text{CDCl}_3$ )  $\delta$  159.7, 145.6, 136.1, 135.1, 129.39, 129.38, 128.2, 127.54, 126.52, 21.8.

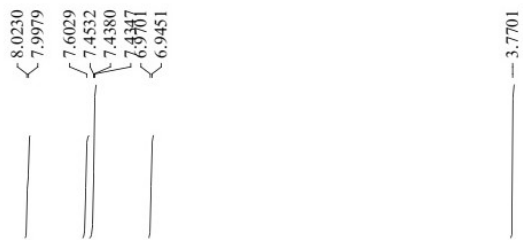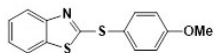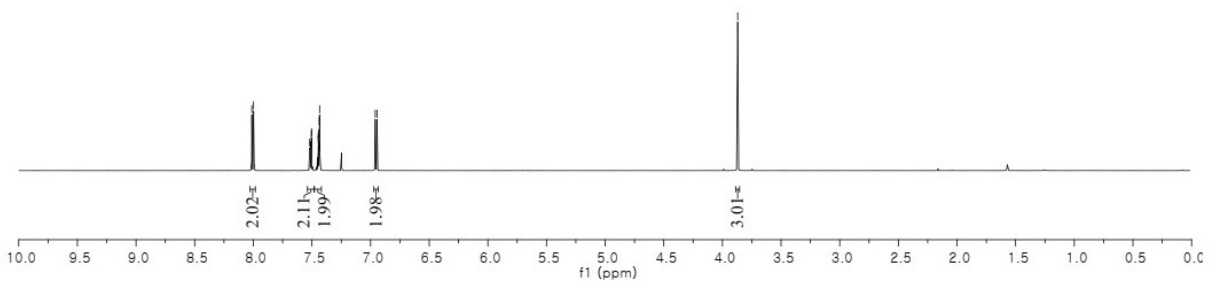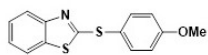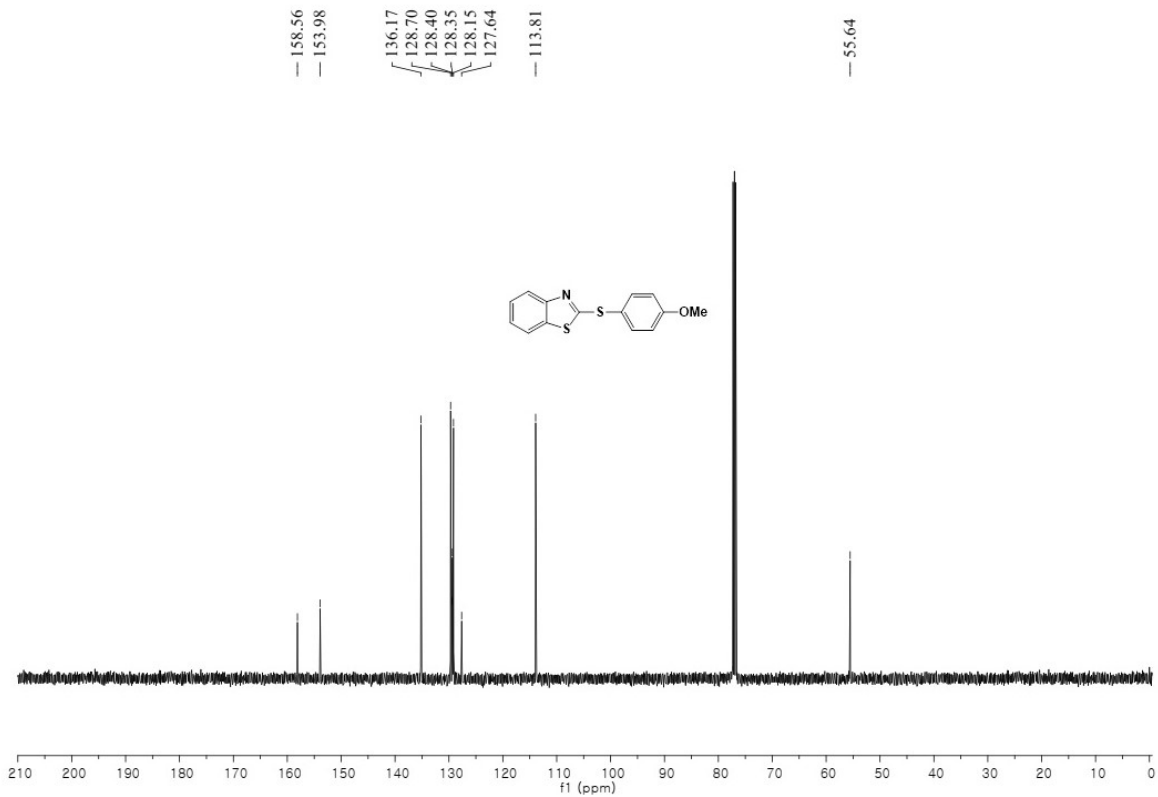

2-((4-methoxyphenyl)thio)benzo[d]thiazole:  $^1\text{H}$  NMR (600 MHz,  $\text{CDCl}_3$ )  $\delta$  8.02 (d,  $J = 9.1$  Hz, 2H), 7.60 (m, 2H), 7.45–7.43 (m, 2H), 6.97 (d,  $J = 9.0$  Hz, 2H), 3.77 (s, 3H);  $^{13}\text{C}$  { $^1\text{H}$ } NMR (126 MHz,  $\text{CDCl}_3$ )  $\delta$  158.6, 154.0, 136.1, 128.7, 128.4, 128.4, 128.2, 127.6, 113.8, 55.6.

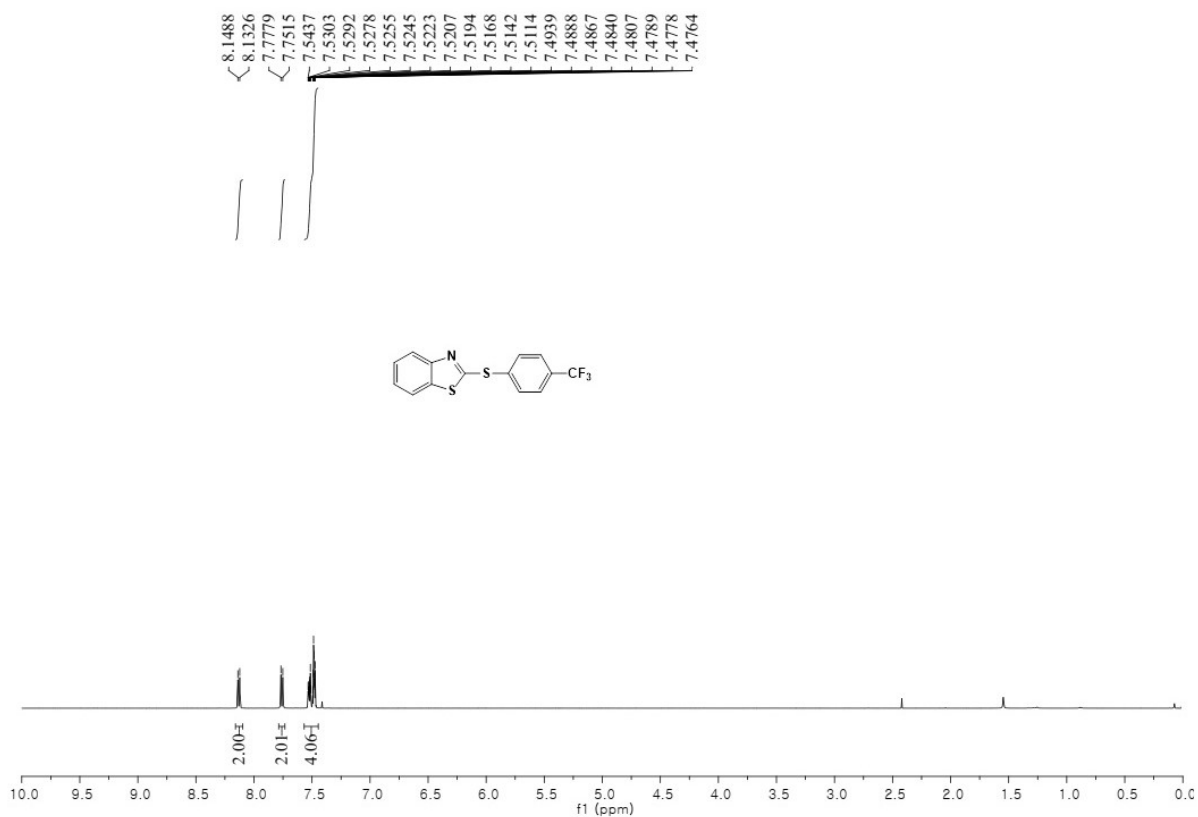

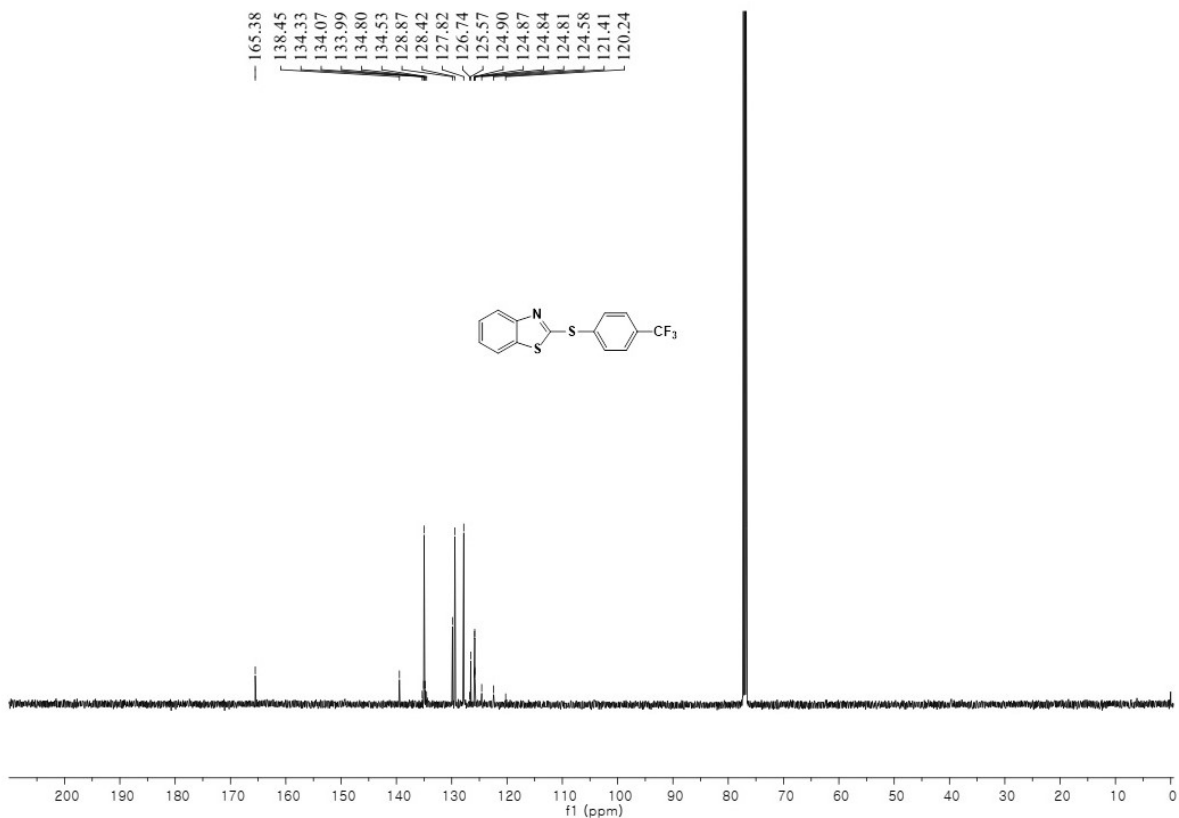

2-((4-(trifluoromethyl)phenyl)thio)benzo[d]thiazole:  $^1\text{H}$  NMR (500 MHz,  $\text{cdCl}_3$ )  $\delta$  8.14 (d,  $J = 8.1$  Hz, 2H), 7.77 (d,  $J = 8.2$  Hz, 2H), 7.54–7.47 (m, 4H);  $^{13}\text{C}$  { $^1\text{H}$ } NMR (126 MHz,  $\text{CDCl}_3$ )  $\delta$  165.4, 138.4, 134.3, 134.0, 128.9, 128.4, 127.8, 126.7, 125.6, 124.9, 124.8, 124.6, 121.4, 120.2.

8.0777  
8.0633  
8.0571  
8.0540  
8.0528  
8.0497  
8.0435  
8.0291  
7.5178  
7.5168  
7.5153  
7.5140  
7.5092  
7.5057  
7.5033  
7.5004  
7.4983  
7.4683  
7.4668  
7.4644  
7.4618  
7.4597  
7.4574  
7.4555  
7.4545  
7.4512  
7.4480  
7.1760  
7.1717  
7.1623  
7.1593  
7.1582  
7.1551

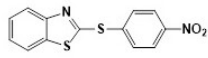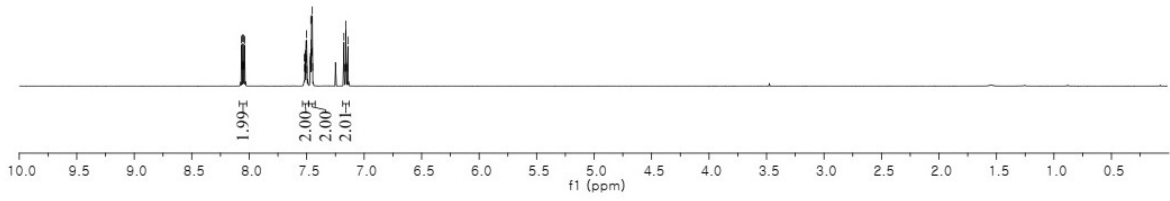

166.08  
164.04  
158.68  
136.09  
133.96  
133.94  
131.09  
131.02  
129.64  
129.29  
128.05  
117.00  
116.83

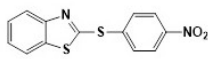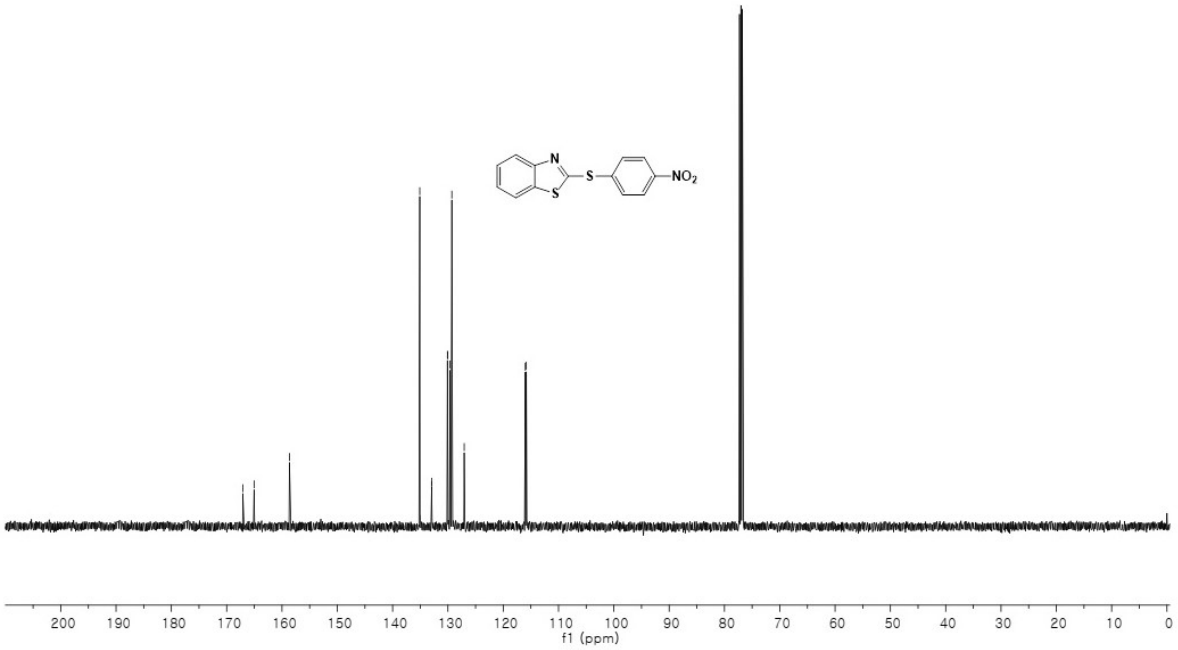

2-((4-nitrophenyl)thio)benzo[d]thiazole:  $^1\text{H}$  NMR (500 MHz,  $\text{CDCl}_3$ )  $\delta$  8.07–8.02 (m, 2H), 7.51–7.50 (m, 2H), 7.50–7.43 (m, 2H), 7.19–7.15 (m, 2H);  $^{13}\text{C}\{^1\text{H}\}$  NMR (126 MHz,  $\text{CDCl}_3$ )  $\delta$  166.1, 164.0, 158.7, 136.1, 133.1, 133.1, 131.1, 131.0, 129.6, 129.3, 128.0, 117.0, 116.9.

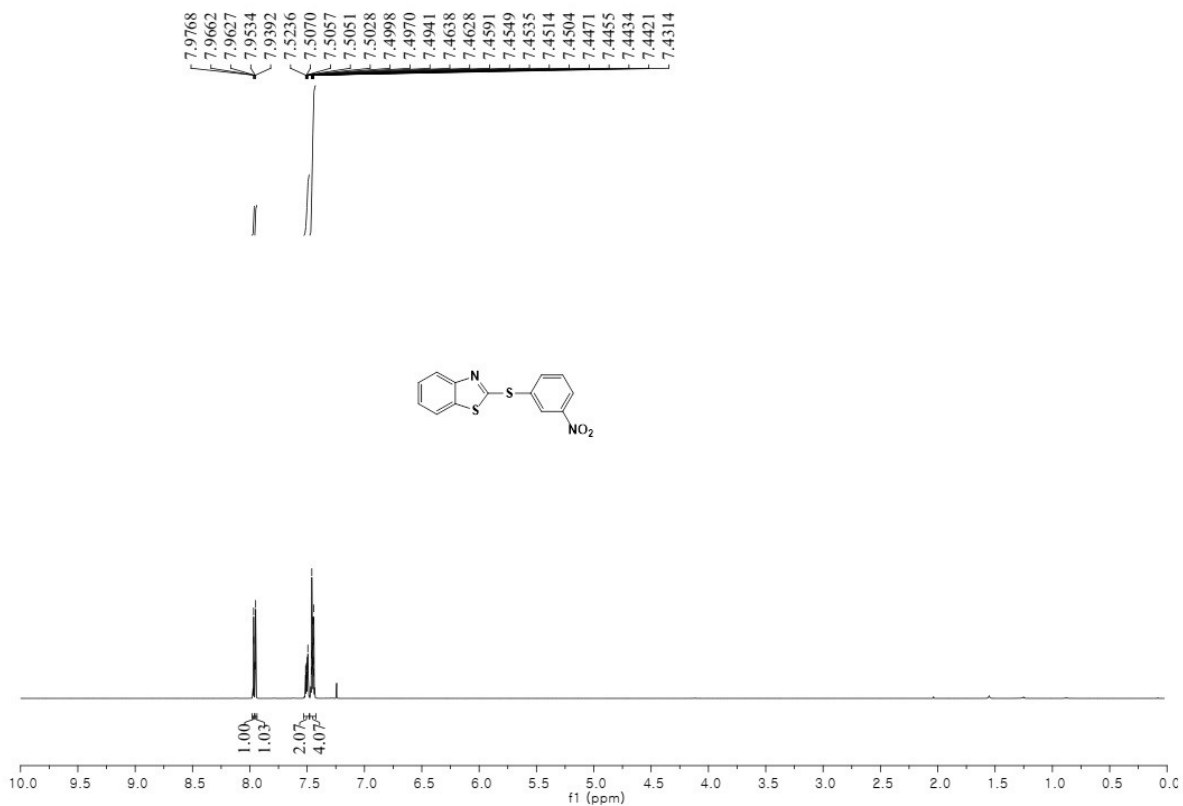

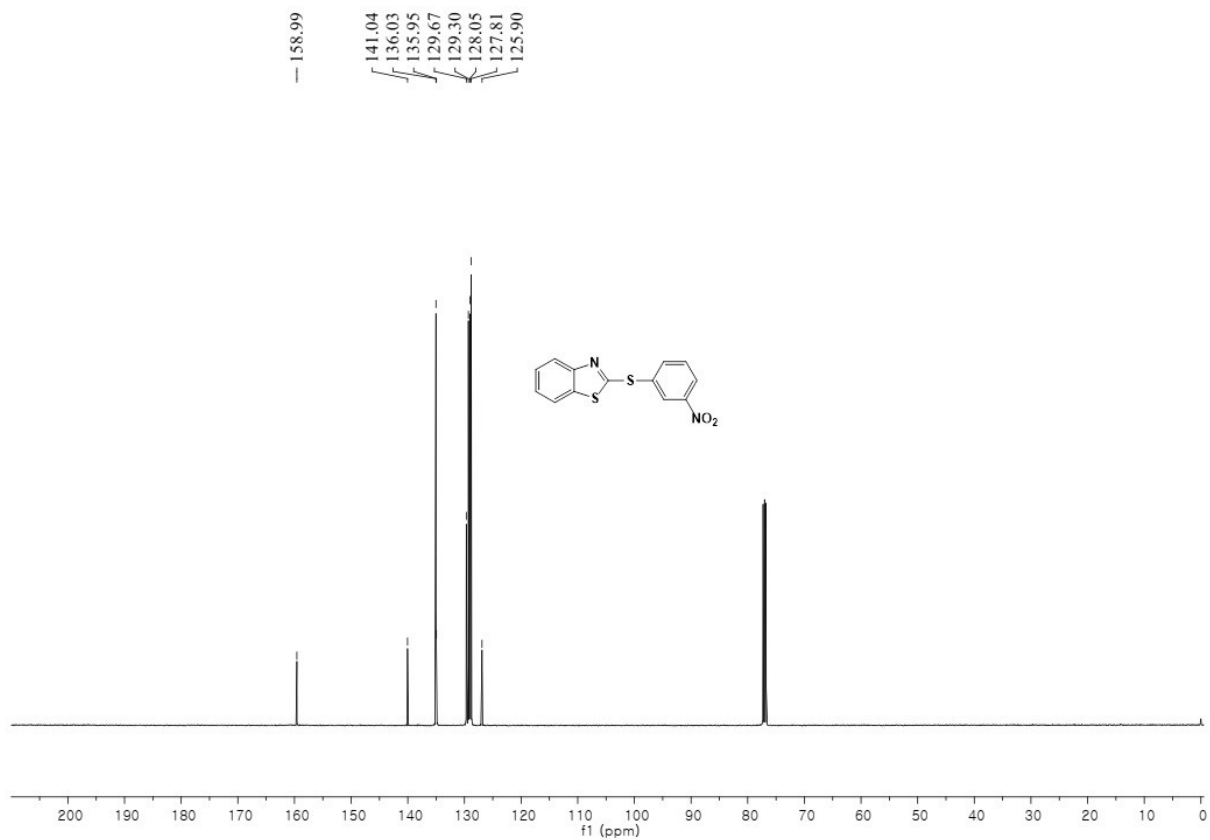

2-((3-nitrophenyl)thio)benzo[d]thiazole:  $^1\text{H}$  NMR (500 MHz,  $\text{CDCl}_3$ )  $\delta$  7.97 (d,  $J = 2.1$  Hz, 1H), 7.96 (d,  $J = 2.1$  Hz, 1H), 7.52–7.48 (m, 2H), 7.47–7.43 (m, 4H);  $^{13}\text{C}\{^1\text{H}\}$  NMR (126 MHz,  $\text{CDCl}_3$ )  $\delta$  158.9, 141.0, 136.0, 135.9, 129.7, 129.3, 128.1, 127.8, 125.9.

8.1175  
8.1014  
8.0665  
8.0406  
7.5236  
7.4768  
7.4631

2.6718

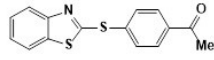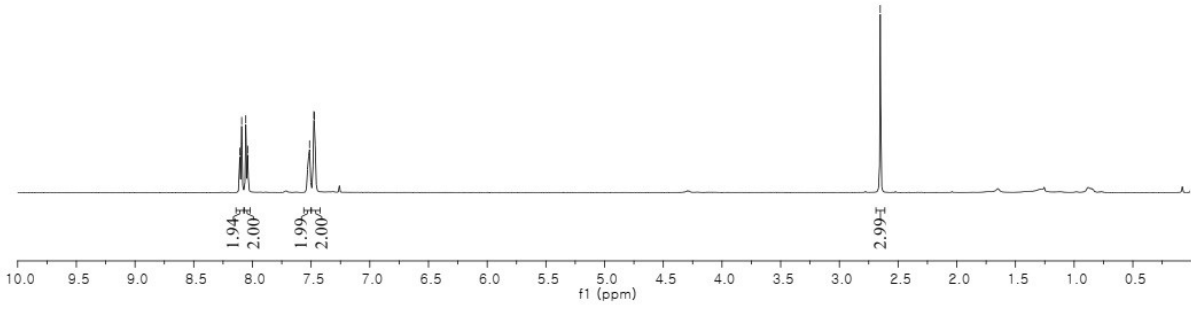



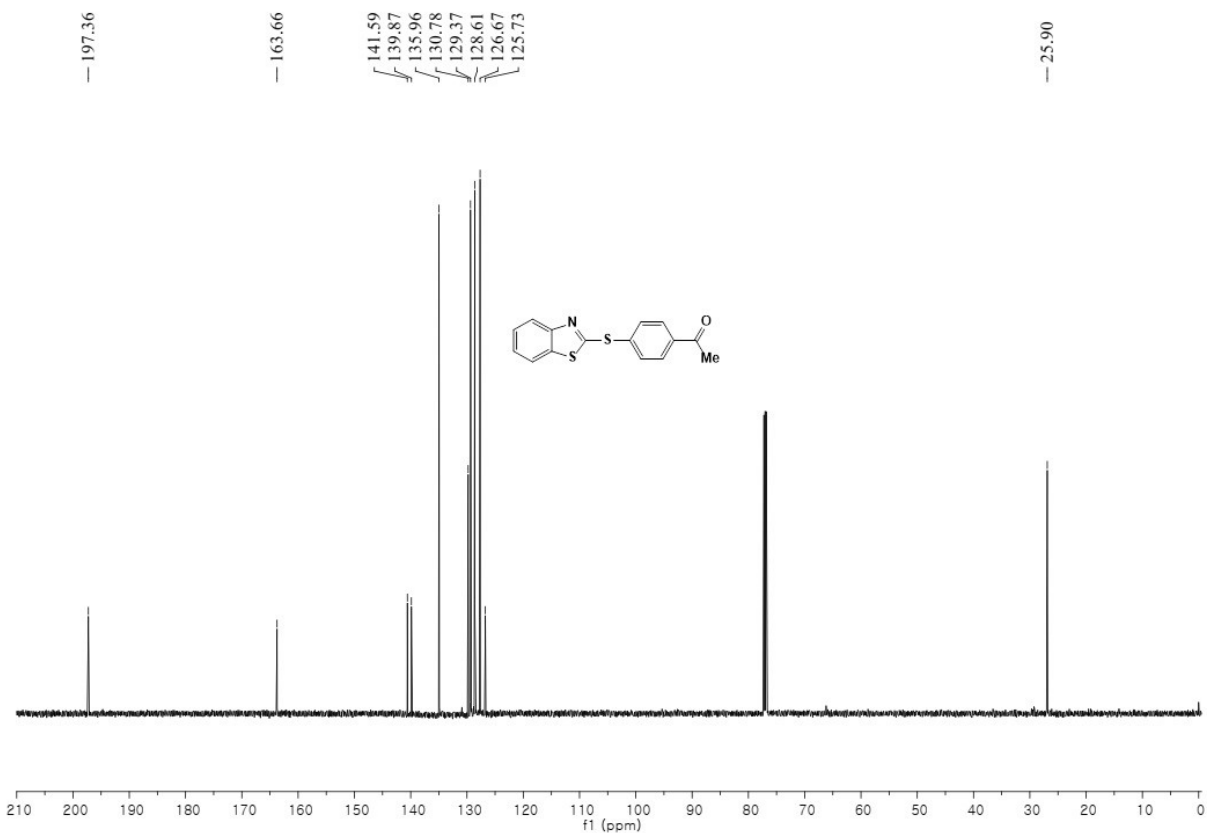

1-(4-(benzo[d]thiazol-2-ylthio)phenyl)ethan-1-one:  $^1\text{H}$  NMR (500 MHz,  $\text{CDCl}_3$ )  $\delta$  8.11 (d,  $J = 8.0$  Hz, 2H), 8.06 (d,  $J = 7.9$  Hz, 2H), 7.52 (m, 2H), 7.50–7.46 (m, 2H), 2.67 (s, 3H);  $^{13}\text{C}\{^1\text{H}\}$  NMR (151 MHz,  $\text{CDCl}_3$ )  $\delta$  197.4, 163.7, 141.6, 139.9, 135.0, 130.8, 129.4, 128.6, 126.7, 125.7, 25.9.

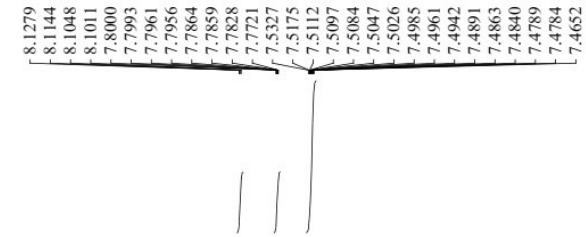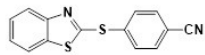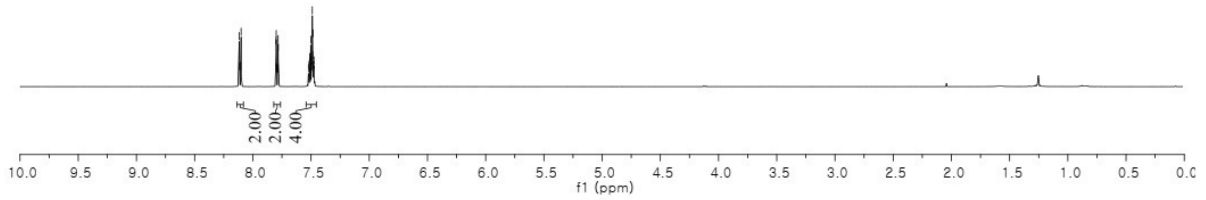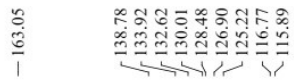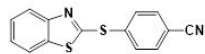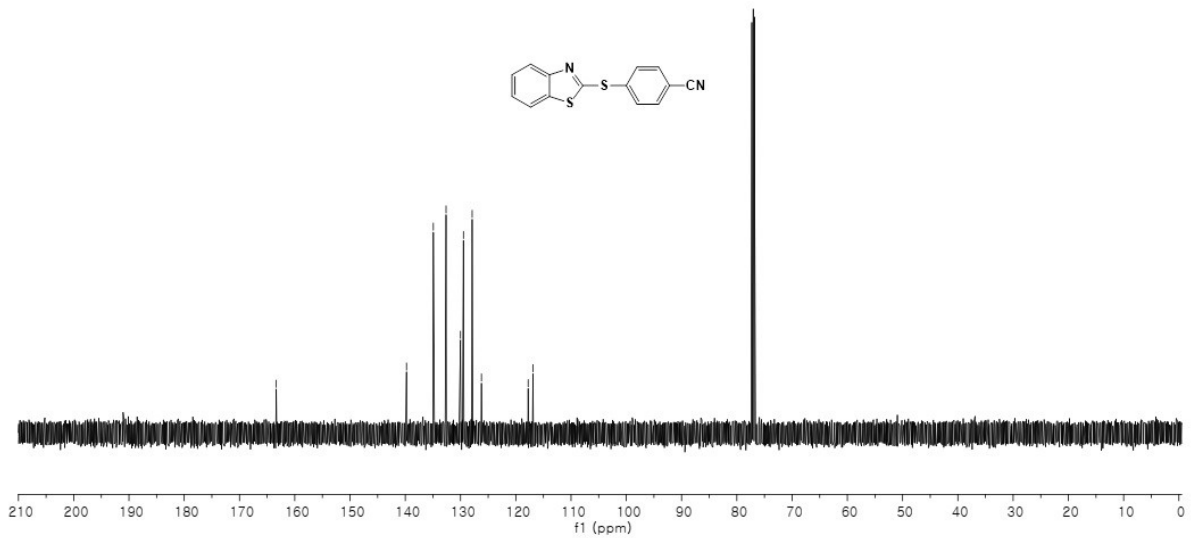

4-(benzo[d]thiazol-2-ylthio)benzotrile:  $^1\text{H}$  NMR (500 MHz,  $\text{CDCl}_3$ )  $\delta$  8.12 (d,  $J = 8.4$  Hz, 2H), 7.80 (d,  $J = 8.3$  Hz, 2H), 7.53–7.46 (m, 4H);  $^{13}\text{C}\{^1\text{H}\}$  NMR (126 MHz,  $\text{CDCl}_3$ )  $\delta$  163.1, 138.8, 133.9, 132.6, 130.0, 128.5, 126.9, 125.2, 116.8, 115.9.

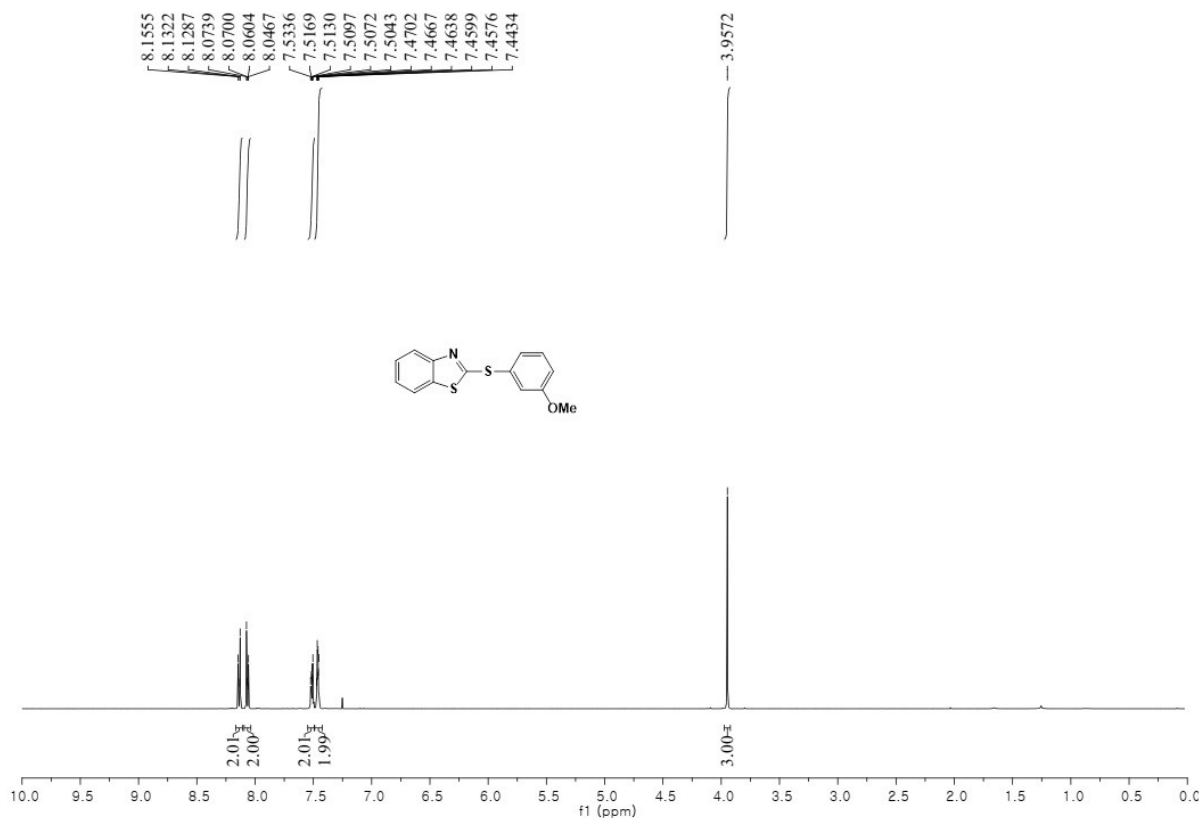

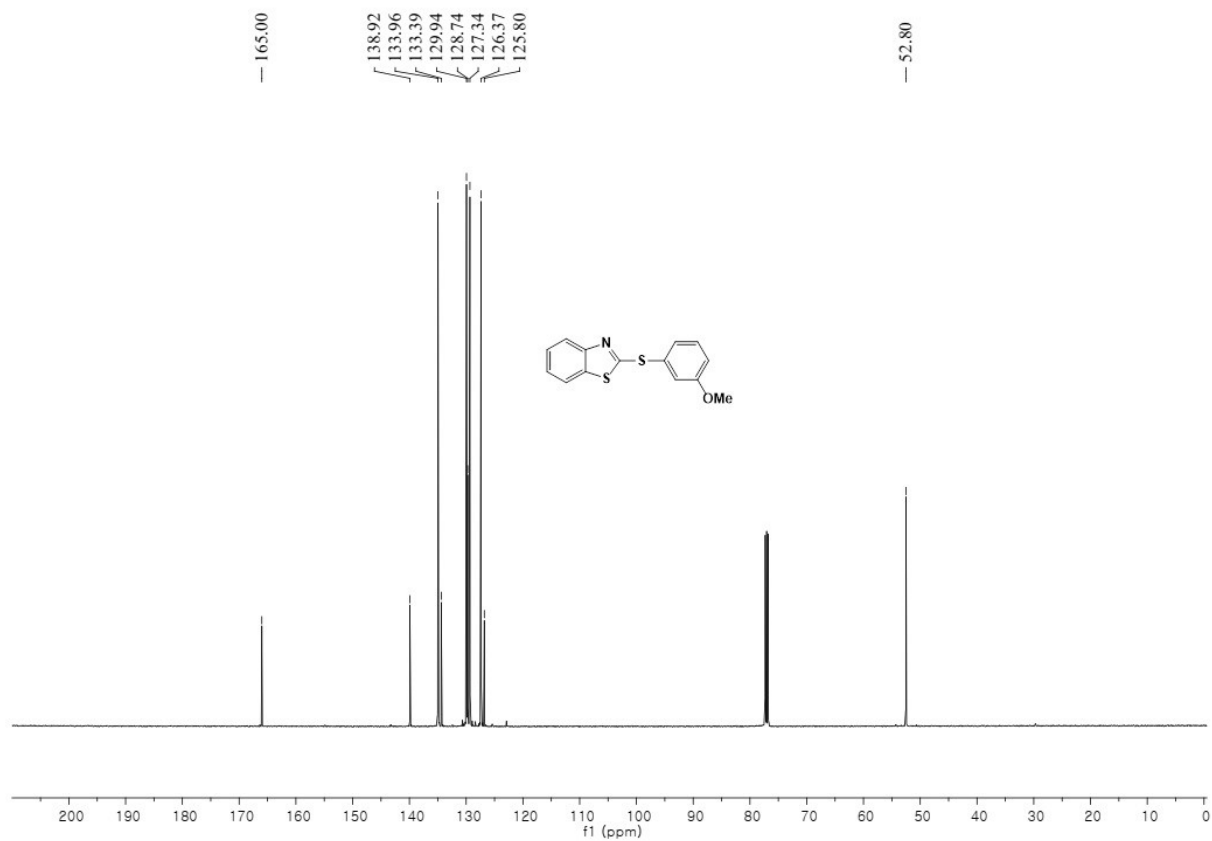

2-((3-methoxyphenyl)thio)benzo[d]thiazole: <sup>1</sup>H NMR (500 MHz, CDCl<sub>3</sub>) δ 8.15 (d, *J* = 8.4 Hz, 2H), 8.06 (d, *J* = 8.6 Hz, 2H), 7.53–7.49 (m, 2H), 7.49–7.44 (m, 2H), 3.96 (s, 3H); <sup>13</sup>C{<sup>1</sup>H} NMR (126 MHz, CDCl<sub>3</sub>) δ 165.1, 166.0, 138.9, 133.0, 133.4, 129.9, 128.7, 127.3, 126.4, 125.8, 52.8.

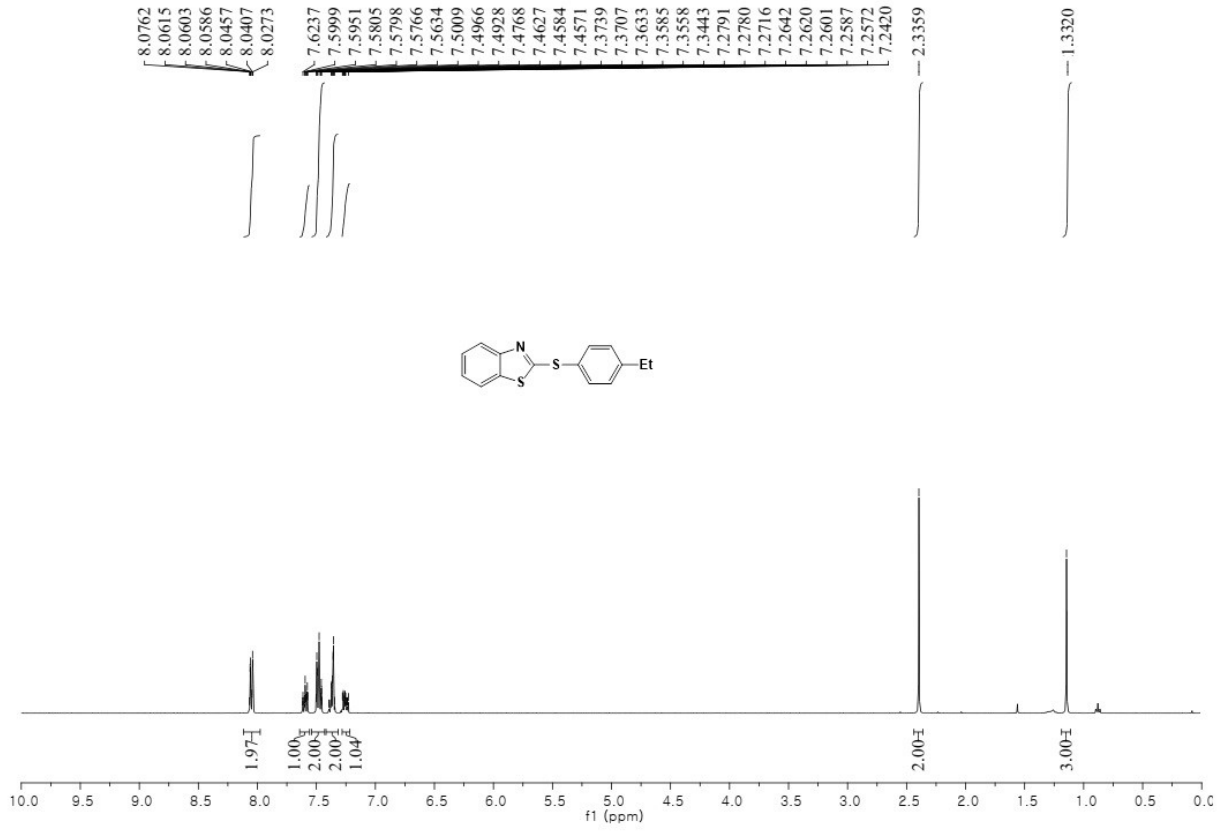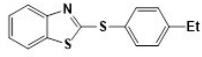

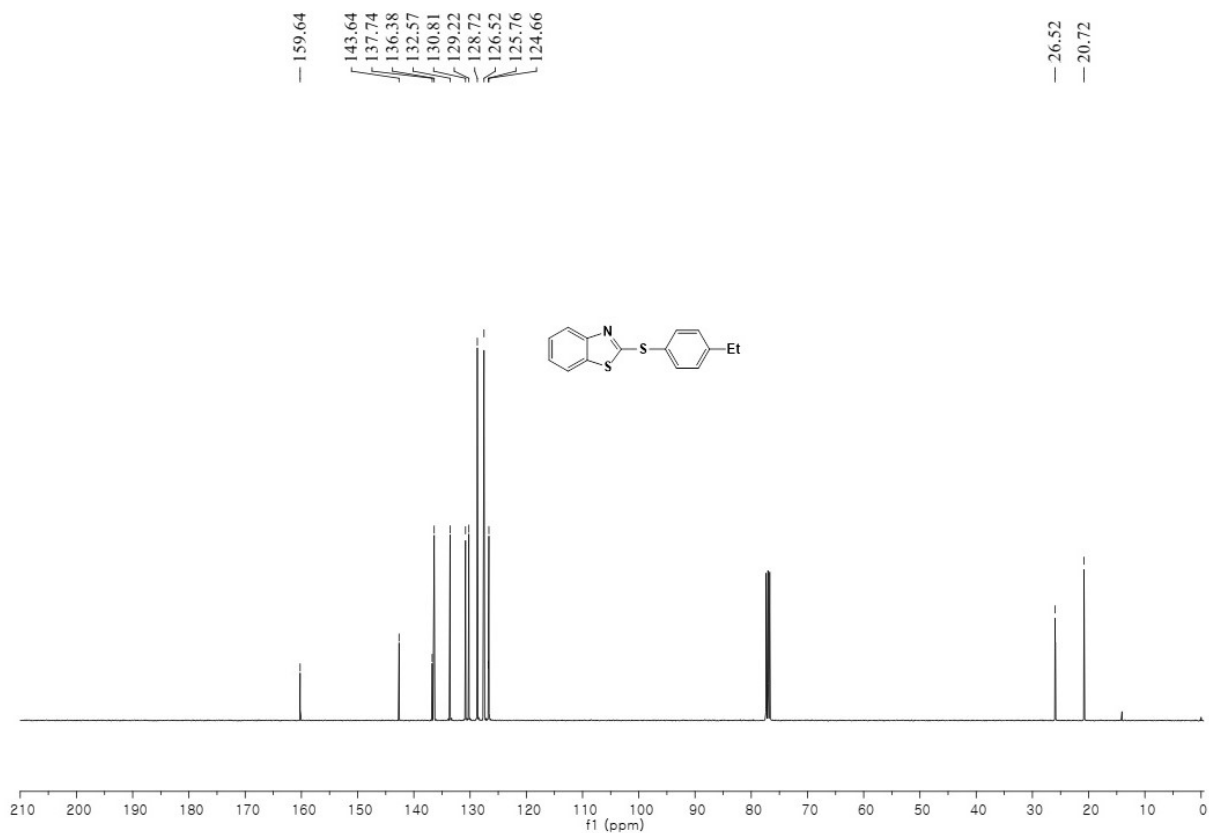

2-((4-ethylphenyl)thio)benzo[d]thiazole:  $^1\text{H}$  NMR (400 MHz,  $\text{CDCl}_3$ )  $\delta$  8.08–8.02 (m, 2H), 7.62–7.56 (m, 1H), 7.56–7.42 (m, 2H), 7.42–7.30 (m, 2H), 7.28–7.24 (m, 1H), 2.30 (s, 2H), 1.3 (s, 3H);  $^{13}\text{C}\{^1\text{H}\}$  NMR (101 MHz,  $\text{CDCl}_3$ )  $\delta$  159.6, 143.6, 137.7, 136.4, 132.6, 130.8, 129.2, 128.7, 126.5, 125.8, 124.7, 26.5, 20.7.

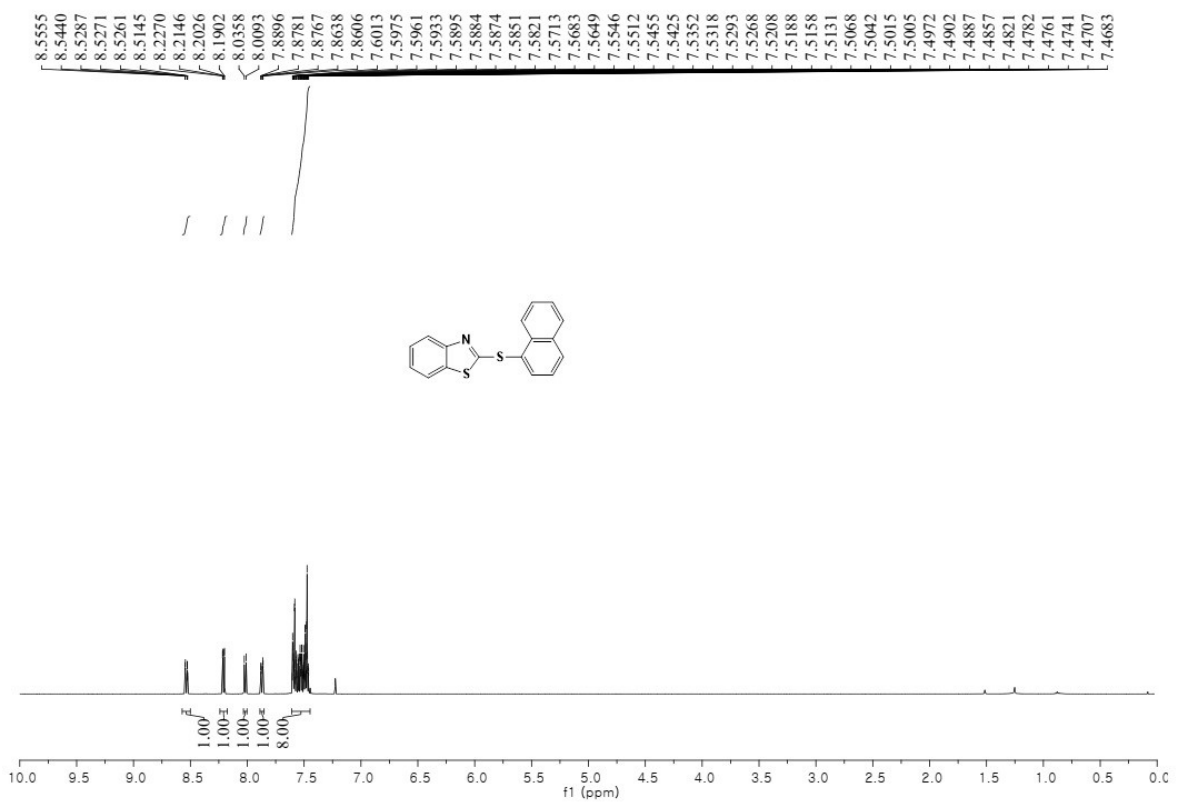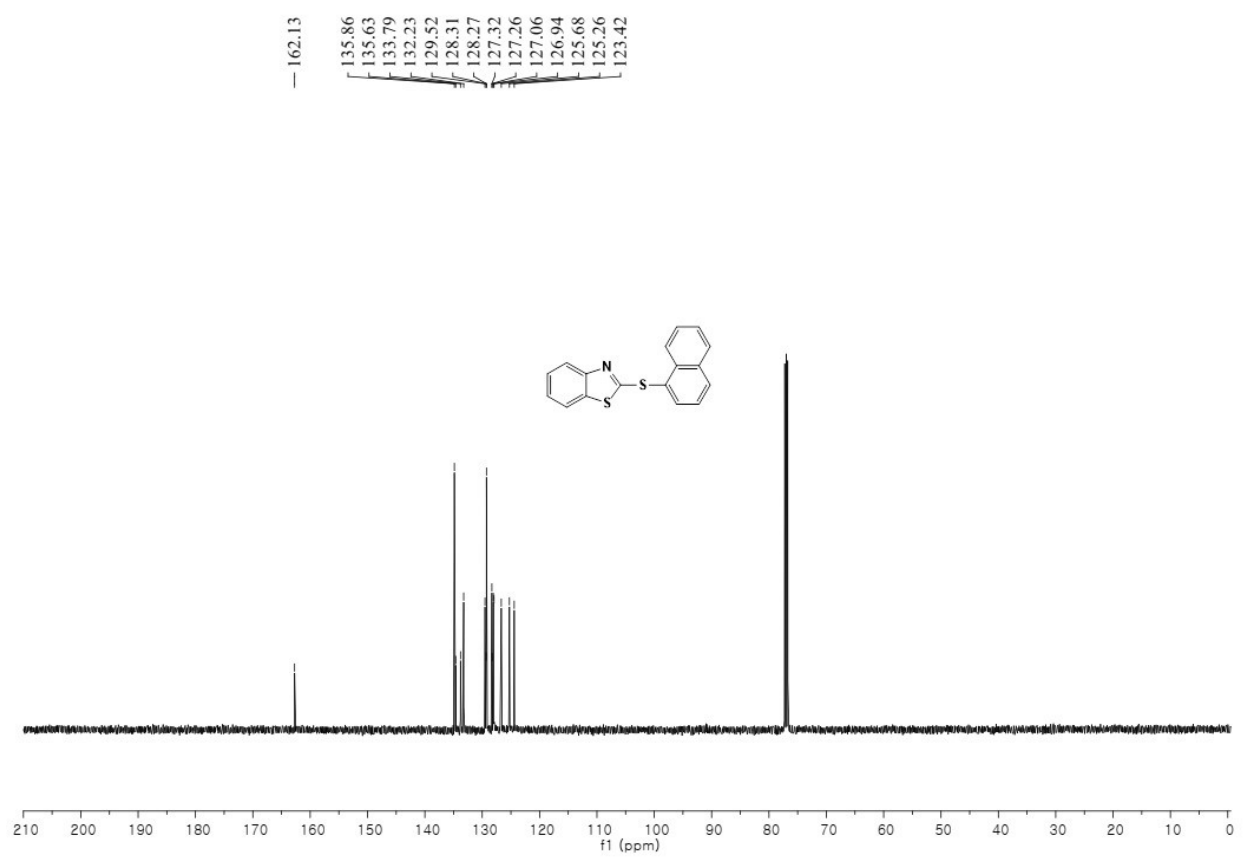

2-(naphthalen-1-ylthio)benzo[d]thiazole:  $^1\text{H}$  NMR (500 MHz,  $\text{CDCl}_3$ )  $\delta$  8.55 (d,  $J = 7.6$  Hz, 1H), 8.20 (dd,  $J = 7.2, 1.2$  Hz, 1H), 8.01 (d,  $J = 8.3$  Hz, 1H), 7.83 (d,  $J = 7.2$  Hz, 1H), 7.60–7.46 (m, 8H);  $^{13}\text{C}\{^1\text{H}\}$  NMR (126 MHz,  $\text{CDCl}_3$ )  $\delta$  162.1, 135.9, 135.6, 133.8, 132.2, 129.5, 128.3, 128.3, 127.3, 127.3, 127.1, 126.9, 125.7, 125.3, 123.4.

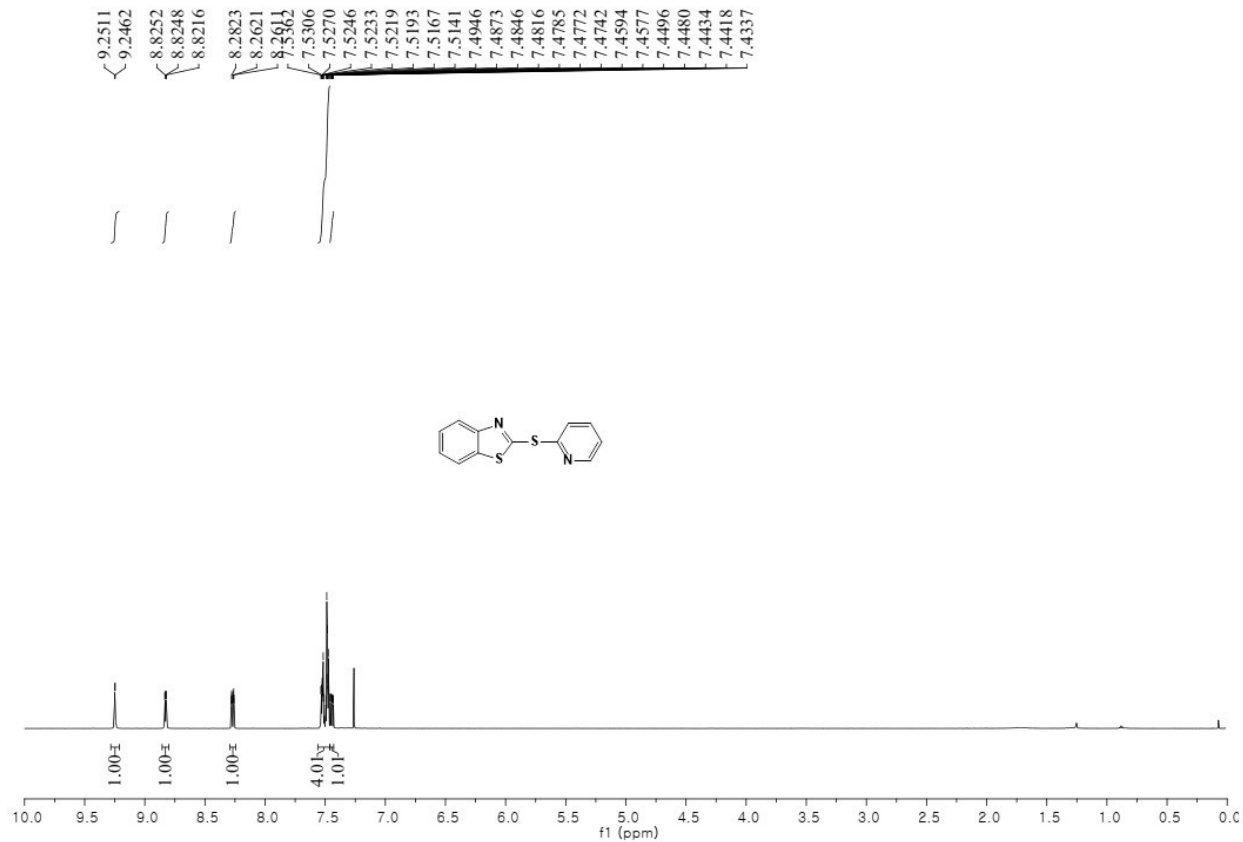



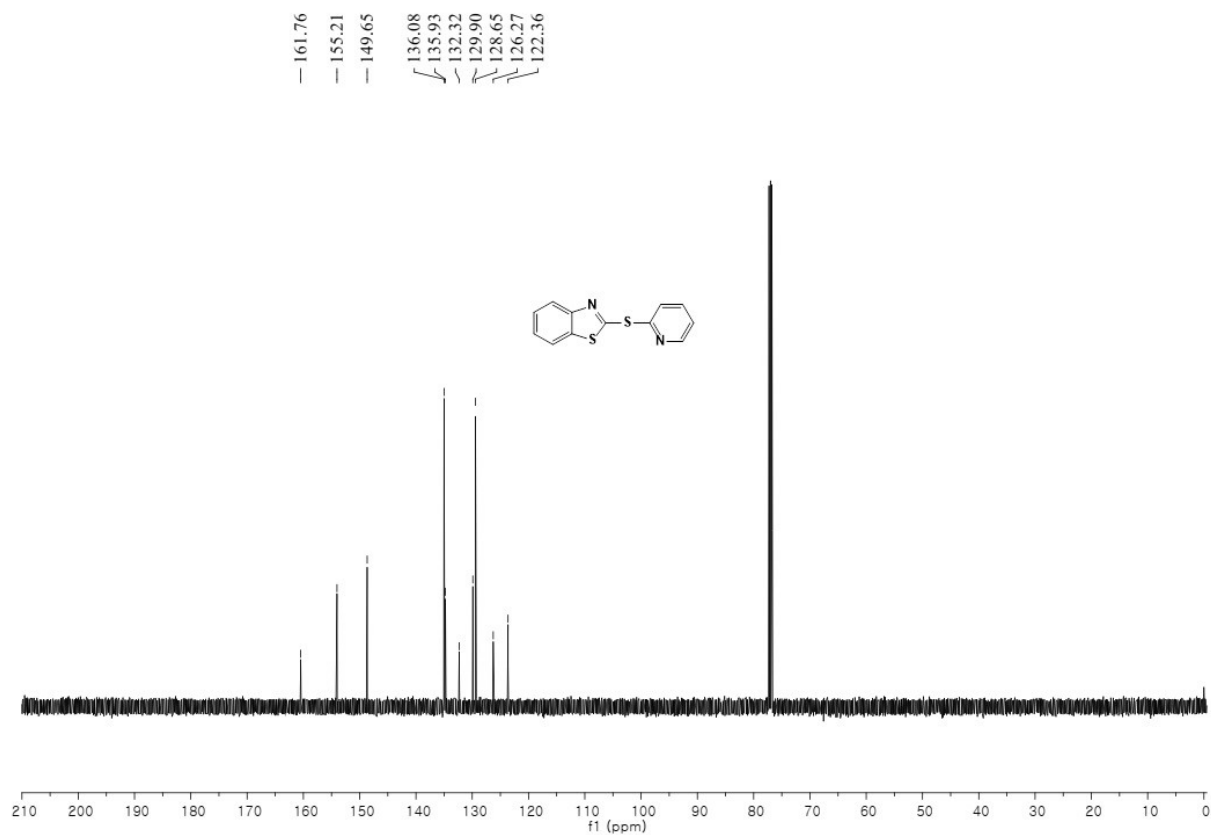

2-(pyridin-2-ylthio)benzo[d]thiazole:  $^1\text{H}$  NMR (500 MHz,  $\text{CDCl}_3$ )  $\delta$  9.24 (d,  $J = 1.7$  Hz, 1H), 8.82 (dd,  $J = 4.8, 1.6$  Hz, 1H), 8.28 (ddd,  $J = 8.0, 2.2, 1.7$  Hz, 1H), 7.57–7.45 (m, 4H), 7.44 (ddd,  $J = 8.0, 4.9, 0.8$  Hz, 1H);  $^{13}\text{C}\{^1\text{H}\}$  NMR (126 MHz,  $\text{CDCl}_3$ )  $\delta$  161.8, 155.2, 149.7, 136.0, 135.8, 132.3, 129.9, 128.4, 126.3, 122.6.

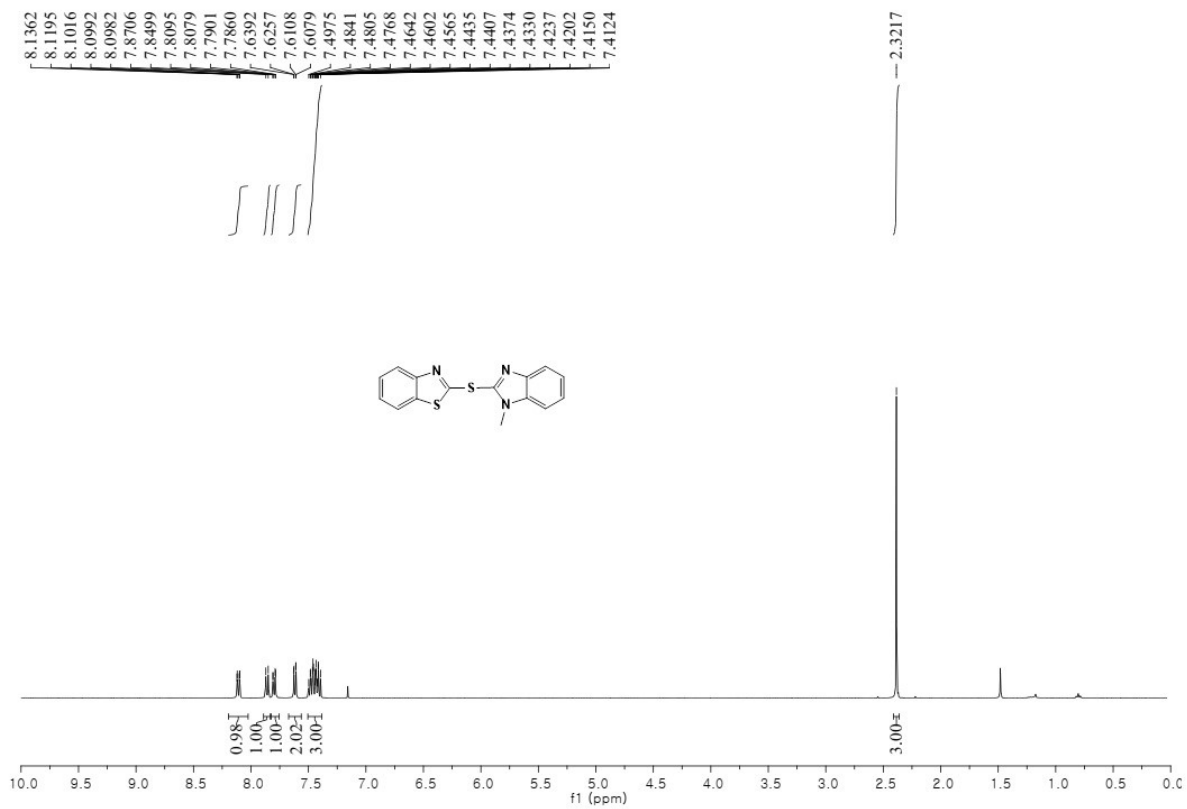

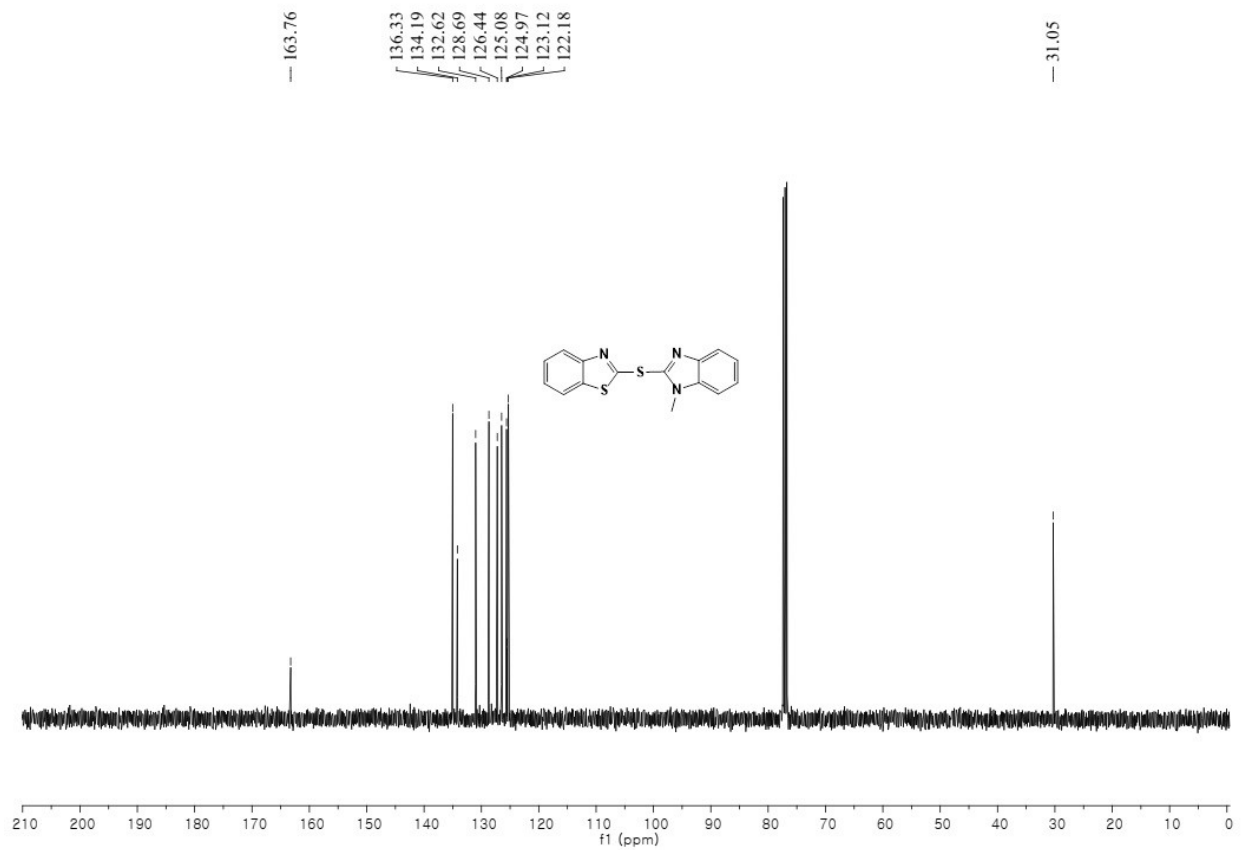

2-((1-methyl-1H-benzo[d]imidazol-2-yl)thio)benzo[d]thiazole:  $^1\text{H}$  NMR (400 MHz,  $\text{CDCl}_3$ )  $\delta$  8.13 (d,  $J = 8.1$  Hz, 1H), 7.87 (d,  $J = 8.3$  Hz, 1H), 7.79 (dd,  $J = 8.2, 1.1$  Hz, 1H), 7.60 (dd,  $J = 7.1, 1.2$  Hz, 1H), 7.51–7.41 (m, 3H), 2.32 (s, 3H);  $^{13}\text{C}$  { $^1\text{H}$ } NMR (101 MHz,  $\text{CDCl}_3$ )  $\delta$  163.8, 136.0, 134.2, 132.6, 128.7, 126.4, 125.1, 124.9, 123.1, 122.1, 31.0.

7.9732  
7.9606  
7.9556  
7.9438  
7.9388  
7.9218  
7.4952  
7.4805  
7.4755  
7.4636  
7.4586  
7.4526  
7.4437

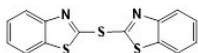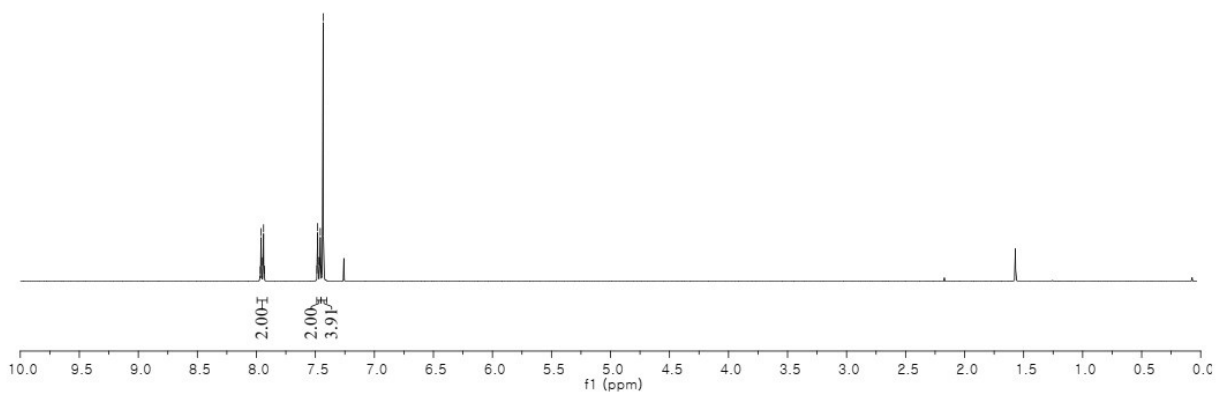

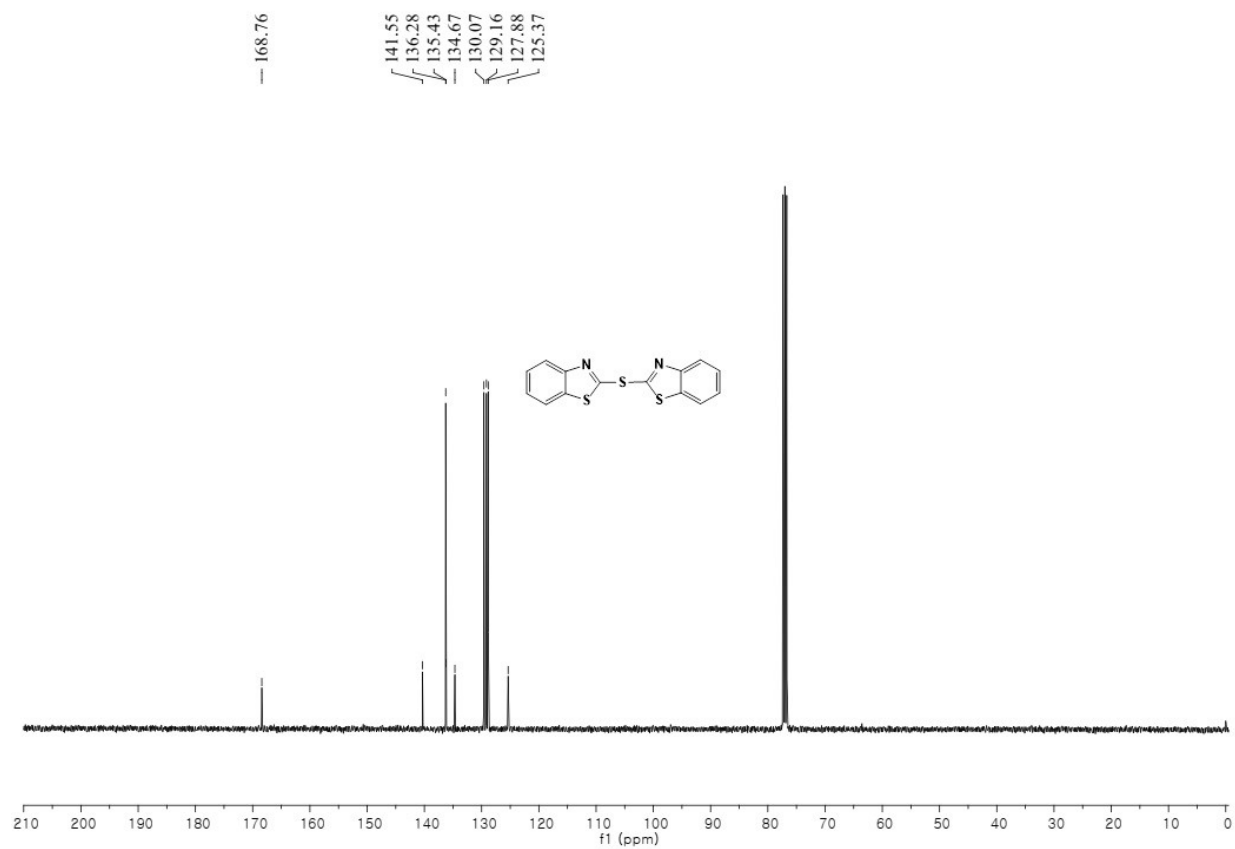

bis(benzo[d]thiazol-2-yl)sulfane:  $^1\text{H}$  NMR (400 MHz,  $\text{CDCl}_3$ )  $\delta$  7.97 (d,  $J = 8.7$  Hz, 2H), 7.49 (d,  $J = 8.8$  Hz, 2H), 7.48–7.44 (m, 4H);  $^{13}\text{C}\{^1\text{H}\}$  NMR (101 MHz,  $\text{CDCl}_3$ )  $\delta$  168.8, 141.5, 136.3, 135.4, 134.7, 130.7, 129.2, 128.8, 125.4.

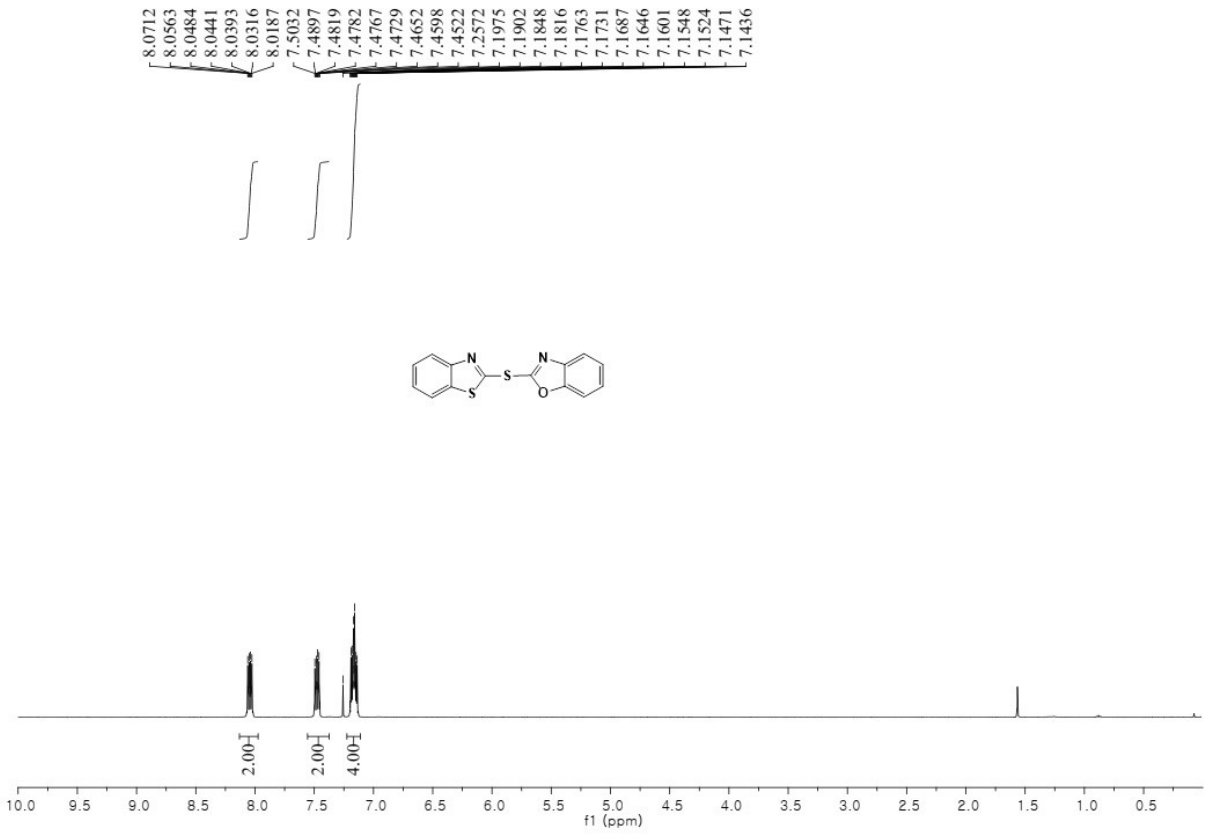

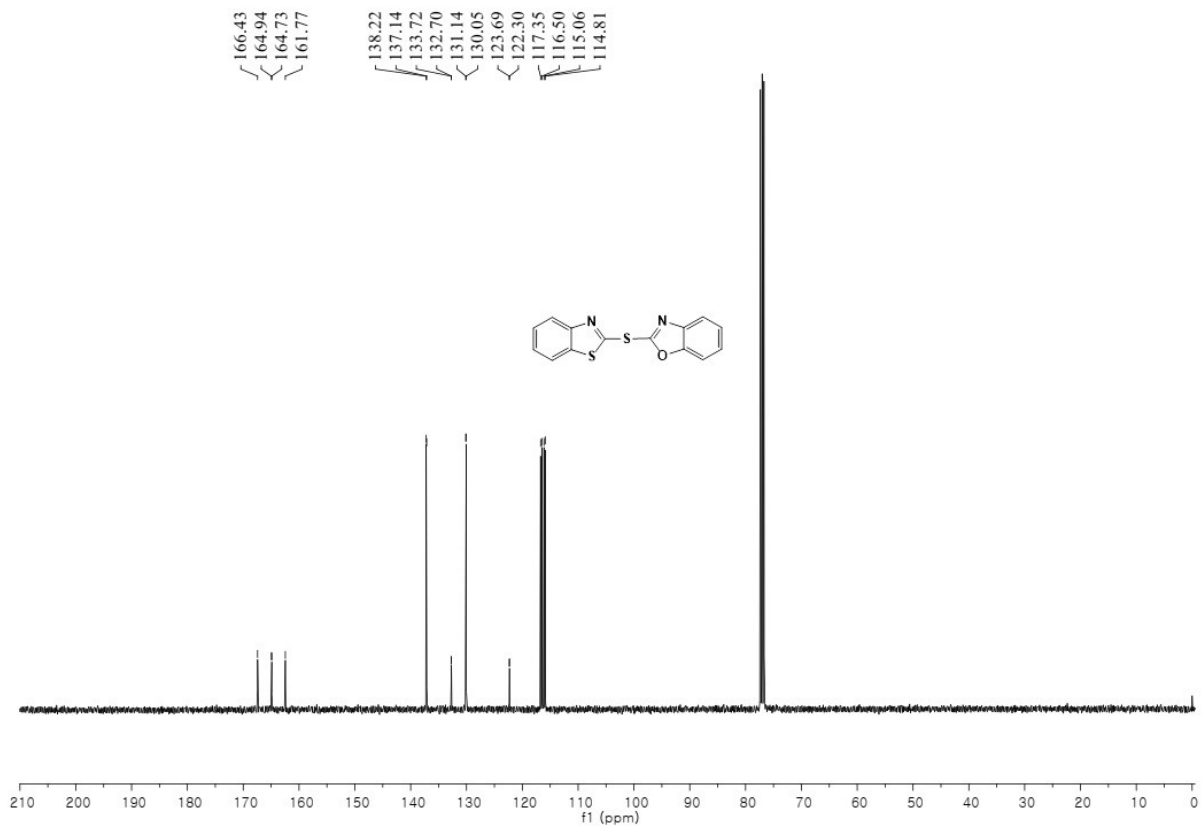

2-(benzo[d]thiazol-2-ylthio)benzo[d]oxazole:  $^1\text{H}$  NMR (400 MHz,  $\text{CDCl}_3$ )  $\delta$  8.07 (dd,  $J = 8.9, 5.3$  Hz, 2H), 7.50 (dd,  $J = 8.9, 5.2$  Hz, 2H), 7.23–7.14 (m, 4H);  $^{13}\text{C}\{^1\text{H}\}$  NMR (101 MHz,  $\text{CDCl}_3$ )  $\delta$  188.7, 166.2 (d,  $J_{\text{C-F}} = 249.6$  Hz), 166.4, 165.0, 164.7, 161.8, 138.2, 137.4, 133.7, 132.7, 131.4, 130.0, 123.7, 122.3, 117.3, 116.5, 115.0, 114.8.

8.0256  
8.0066  
7.9946  
7.9693  
7.4328  
7.3981  
6.9887  
6.9665  
6.9614  
6.9178

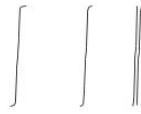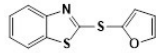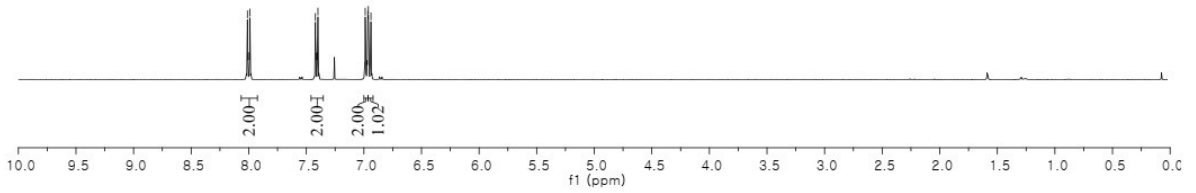

164.56  
161.38  
137.54  
130.25  
129.41  
119.08  
115.38  
114.81

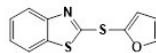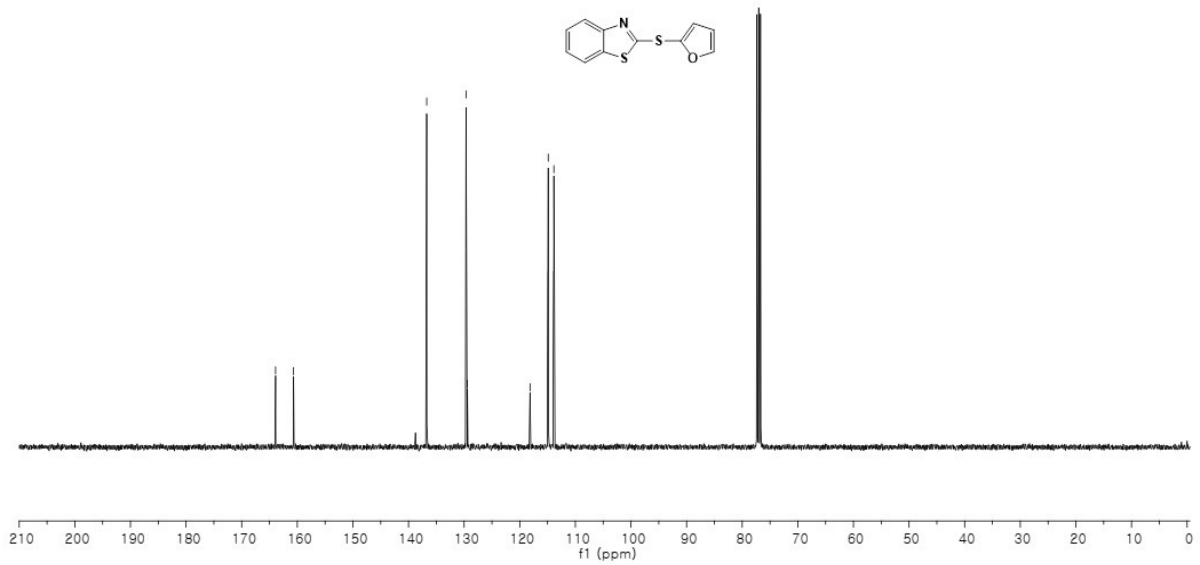



2-(furan-2-ylthio)benzo[d]thiazole:  $^1\text{H}$  NMR (400 MHz,  $\text{CDCl}_3$ )  $\delta$  8.02 (d,  $J = 9.0$  Hz, 2H), 7.43 (d,  $J = 8.9$  Hz, 2H), 6.97 (d,  $J = 8.9$  Hz, 2H), 6.91 (d,  $J = 9.0$  Hz, 1H);  $^{13}\text{C}\{^1\text{H}\}$  NMR (101 MHz,  $\text{CDCl}_3$ )  $\delta$  164.6, 161.4, 137.5, 130.1, 129.4, 119.1, 115.4, 114.1.
